# Supplementary material for: A Peptide‐Induced Self‐Cleavage Reaction Initiates the Activation of Tyrosinase
Source: PubMed Central journal article supplement (PMC6563526; doi:10.1002/anie.201901332), 2019-04-17
Supplement: ANIE-58-7475-s001.pdf [file ANIE-58-7475-s001.pdf]

Supporting Information

**A Peptide-Induced Self-Cleavage Reaction Initiates the Activation of Tyrosinase**

*Ioannis Kampatsikas, Aleksandar Bijelic, Matthias Pretzler, and Annette Rompel\**

anie\_201901332\_sm\_miscellaneous\_information.pdf

## **Table of Contents**

|                                       |    |
|---------------------------------------|----|
| 1. Supplementary Material and Methods | 2  |
| 2. Supplementary Notes                | 5  |
| 3. Supplementary Figures              | 8  |
| 4. Supplementary Tables               | 27 |
| 5. References                         | 30 |

## 1. Supplementary Materials and Methods

**Plasmid preparation and heterologous expression of pro-*MdPPO1* in *E. coli*.** The pro-form of *MdPPO1* was heterologously expressed and purified as described elsewhere.<sup>[1]</sup>

**Plasmid preparation and heterologous expression of the C<sub>sole</sub>-domain in *E. coli*.** The plasmid of *MdPPO1* in the pGEX-6P-1 vector was used as template to create the C-terminal domain construct in the pGEX-6P-1 vector for heterologous expression in *E. coli*. Primers have been designed (Table S2) and site direct mutagenesis (Q5<sup>®</sup> Site-Directed Mutagenesis Kit from New England Biolabs) was used in order to delete the active domain from the plasmid and bring the C-terminal domain in frame with the glutathione-S-transferase (GST) tag. The fusion gene with the C-terminal domain (GST-C<sub>sole</sub>) was efficiently overexpressed using the synthetic *tac* promoter of the pGEX-6P-1 vector. The expression and purification of the C<sub>sole</sub>-domain followed the same protocol as the one described previously for pro-*MdPPO1*.<sup>[1]</sup> C<sub>sole</sub>-domain was stored in 50 mM Tris-HCl pH 7.5 and 200 mM NaCl and was used for crystallographic and biochemical studies.

**Design of the mutants and heterologous expression in *E. coli*.** The plasmid of *MdPPO1*, *MdPPO2* and *CgAUS1* in the pGEX-6P-1 vector were used as templates for the construction of the mutants (Table S1) in pGEX-6P-1 for heterologous expression in *E. coli*. Primers have been designed (Table S2) and site direct mutagenesis (Q5<sup>®</sup> Site-Directed Mutagenesis Kit) was used. The mutant fusion genes were efficiently overexpressed using the synthetic *tac* promoter of the pGEX-6P-1 vector. The heterologous expression of all the mutants followed the same protocol described previously for pro-*MdPPO1*.<sup>[1]</sup>

**SDS-PAGE analysis and protein concentration determination.** The quality of heterologous expression and the purity of the recombinant proteins were analyzed via SDS-PAGE using 13% acrylamide gels.<sup>[2]</sup> The samples were mixed with half a volume of loading buffer (250 mM Tris-HCl pH 6.8, 3% SDS, 20% glycerol, 0.02% bromophenol blue and 7.5% (v/v) β-mercaptoethanol) and were denatured at high temperature (99 °C) for 5 minutes. Afterwards the samples were loaded on the SDS-PAGE gel and run in a Mini-PROTEAN Tetra Cell System (Biorad, Vienna, Austria). Precision Plus Protein Dual Color Standard (Biorad) was used as protein-marker. The separated proteins were visualized by Coomassie staining (0,02% Coomassie brilliant blue G-250, 5 % aluminium sulfate, 10 % ethanol and 2% orthophosphoric acid). Protein concentrations were determined according to the Lambert-Beer law and their absorption at 280 nm using the extinction coefficient provided by ExpASy ProtParam.<sup>[3,4]</sup>

**Molecular mass determination by ESI-QTOF-MS and ESI LTQ Orbitrap Velos.** Electrospray Ionization Mass Spectrometry (ESI-MS) was performed on a nano electrospray ionization - quadrupole and time-of-flight mass spectrometer (ESI-QTOF-MS, MaXis 4G UHR-TOF, Bruker) with a mass range of 50 - 20000 m/z. Pure pro-*MdPPO1* (already self-cleaved into the active form and the C<sub>cleaved</sub>-domain), as well as mutation-1, mutation-2 and the rest of the mutants of (Table S1) (already self-cleaved into the active form and the C-terminal domain) were used at a concentration of 10 g/l. The buffer was exchanged to 5 mM ammonium acetate (pH 7.0) and the protein solutions were diluted to 1 % (v/v) in 2 % acetonitrile and 1 % formic acid before being applied to the mass spectrometer. Mass determination of *MdPPO2*(+) and *CgAUS1*(+) (already self-cleaved into the active form and the C-terminal domain) was performed by an ESI - LTQ - Orbitrap Velos (Thermo Fisher Scientific Bremen, Germany) with a mass range of 200 - 4000 m/z and a mass accuracy

close to 3 ppm with external calibration. Prior to MS *MdPPO2(+)* solution was ultra-filtrated by centrifugation and the buffer was exchanged to 5 mM ammonium acetate (pH 7.0) and the protein solution was diluted 100 times in a mixture of 80 % (v/v) acetonitrile and 0.1 % (v/v) formic acid.

**Self-cleaving of *MdPPO1* at different temperatures.** Pro-*MdPPO1* was investigated at different temperatures in order to examine the influence of the temperature on self-cleaving. The enzyme was incubated at the following temperatures: 4, 20, 25, 37 and 65 °C. Samples were tested after different incubation times *via* SDS-PAGE (Figure S6).

**Self-cleaving of *MdPPO1* at different pH values.** Pro-*MdPPO1* was investigated at different pH values in order to examine the influence of pH on self-cleaving. 50 mM sodium citrate buffer was used to analyze the pH-range between pH 2.0 and 6.0 in steps of 1 pH units, whereas 50 mM Tris-HCl buffer was used to investigate the process in the range between pH 7.0 to 9.0 in steps of 1 pH units. Samples were stored at 4 °C and tested after different incubation times *via* SDS-PAGE (Figure S7).

**Influence of protease inhibitors on the self-cleaving of pro-*MdPPO1*.** Pro-*MdPPO1* was incubated with a range of protease inhibitors to investigate their influence on the self-cleaving process. For this purpose 300 µg of pro-*MdPPO1* (~265 µM) was incubated with 2 mM phenylmethylsulfonyl fluoride (Karl Roth, Karlsruhe, Germany), 2 mM benzamidine hydrochloride (Sigma-Aldrich, Vienna, Austria), 10 mM EDTA (Sigma-Aldrich) and 0.1 - 50 µM pepstatin A (Sigma-Aldrich), respectively. In addition, the commercially available mixture of protease inhibitors SigmaFAST (Sigma-Aldrich) was examined. The final assay mixture contained 300 µg of *MdPPO1*, 2 mM AEBSF-[4-(2-Aminoethyl)benzenesulfonyl fluoride hydrochloride], 130 µM bestatin hydrochloride, 1 µM leupeptin, 14 µM E-64 -[N-(trans-Epoxy succinyl)-L-leucine 4-guanidinobutylamide], 0.2 µM aprotinin, 10 µM pepstatin A and 1 µM phosphoramidon disodium salt. All incubation trials were carried out in the storage buffer (50 mM Tris-HCl pH 7.5 and 200 mM NaCl) at 4 °C (Figure S8 and S9).

**Crystallization.** Crystallization of pro-*MdPPO1* was performed as reported elsewhere.<sup>[5]</sup> To obtain crystals of the C<sub>cleaved</sub>-domain, a solution containing the pro-enzyme was prepared and was stored more than 30 days at 4 °C to let the self-cleaving process take place. The self-cleaved sample was used for initial screening, which was performed manually by applying the hanging-drop vapor-diffusion technique using 15 well EasyXtal plates (Qiagen, Hilden, Germany). The screening procedure yielded some promising hits (small crystals). The initial hits were optimized and high quality crystals of the C<sub>cleaved</sub>-domain were finally grown at 20 °C by mixing 1 µl protein solution (15 mg ml<sup>-1</sup>) with 1 µl of the reservoir solution (100 mM Tris-HCl pH 8.25, 13 % PEG8000). Crystals usually appeared after 5 - 10 d. The same conditions were used to crystallize the C<sub>sole</sub>-domain.

**Data collection, structure solution and refinement.** Crystal harvesting and data collection of pro-*MdPPO1* was performed as described elsewhere.<sup>[5]</sup> The crystals of the C<sub>cleaved</sub>- and C<sub>sole</sub>-domain were quickly plunged into cryo-protectant solution consisting of 100 mM Tris-HCl at pH 8.25, 20% PEG 8000 and 25% PEG 1500 and were afterwards mounted in nylon loops and immediately flash-cooled in liquid nitrogen. Data collection of the C<sub>cleaved</sub>-domain was carried out at 100 K on beamline ID-30A-1, at the ESRF, Grenoble, France, whereas data of the C<sub>sole</sub>-domain were collected on beamline ID-23-1, at the same synchrotron facility. Data collection statistics are summarized in Table S3. C<sub>cleaved</sub>-domain crystals diffracted X-rays to a maximum resolution of 1.35 Å, whereas those of the C<sub>sole</sub>-domain reached



resolutions up to 1.05 Å. All crystals belonged to space group  $P2_12_12_1$  exhibiting the following cell parameters:  $a = 45.23$  Å,  $b = 50.14$  Å,  $c = 50.72$  Å with  $\alpha = 90^\circ$ ,  $\beta = 90^\circ$  and  $\gamma = 90^\circ$  for the  $C_{\text{cleaved}}$ -domain and  $a = 45.13$  Å,  $b = 50.10$  Å,  $c = 50.54$  Å with  $\alpha = 90^\circ$ ,  $\beta = 90^\circ$  and  $\gamma = 90^\circ$  for the  $C_{\text{sole}}$ -domain. Data sets of the C-terminal domain were processed with XDS.<sup>[6]</sup>

The structure of pro-*Md*PPO1 (including the N-terminal domain) was solved by molecular replacement (MR).<sup>[5]</sup> To find an appropriate model for the (MR) step, a BLAST search<sup>[7]</sup> was performed using the sequence of pro-*Md*PPO1 as template. The BLAST results provided several promising MR-models, where the model with the highest coverage (0.97 according to BLAST) was the structure of aurone synthase from *Coreopsis grandiflora* (PDB entry 4Z11, sequence identity of 43.0%),<sup>[8,9]</sup> and the model with the highest sequence identity was the structure of tyrosinase from *Juglans regia* (PDB entry 5CE9, sequence identity of 66.6%).<sup>[10,11]</sup> Initial MR-runs with both potential models using phenix.phaser from the PHENIX suite<sup>[12]</sup> revealed that the tyrosinase structure was more suitable as MR-model owing to higher MR-scores in comparison to those obtained with the structure of aurone synthase. The final MR-model was obtained by modifying the tyrosinase structure with the sequence of pro-*Md*PPO1 using the modelling software MODELLER.<sup>[13]</sup> After initial phases were derived, AutoBuild<sup>[14]</sup> was used to build the initial *Md*PPO1 model, which was then refined until convergence using phenix.refine.<sup>[12]</sup> The quality of the final model was verified and evaluated by the MolProbity server and deposited in the PDB under the entry 6ELS. The structures of the C-terminal domains were solved as described above using the C-terminal domain of the solved pro-*Md*PPO1 as MR model. The final structures of the  $C_{\text{cleaved}}$ - and  $C_{\text{sole}}$ -domain were deposited in the PDB and may be retrieved from the entries 6ELT and 6ELV, respectively.

## 2. Supplementary Notes

**The overall structure of pro-*MdPPO1*.** The active site region of *MdPPO1* consists of a binuclear copper center (CuA and CuB), where each copper ion is coordinated by three histidine residues (CuA by His86, His107 and His116 and CuB by His238, His242 and His272), and is wrapped by a four- $\alpha$ -helical bundle. The structure lacks two highly conserved disulfide bonds (Cys11-Cys26 and Cys25-Cys87) most likely due to *MdPPO1* expression in *E. coli*, an organism which lacks the appropriate machinery for cystine formation. Moreover, despite the high resolution, the structure of pro-*MdPPO1* suffers from some structural imperfections due to missing electron density, namely at the N-terminus (the sequence of the structure starts with Lys32) and three gaps within loop regions (His86-Gln105, Ala349-Val359 and His453-Lys457). The largest gap from His86 to Gln105 is also the most critical one as it affects a loop connecting two  $\alpha$ -helices within the active site forming  $\alpha$ -helical bundle. However, some electron density for the CuA-coordinating His86 was found enabling the structural completion of the active site, and in addition, the sulfur atom of the adjacent Cys90 was detected indicating that the thioether bridge, which is conserved among structurally known plant PPOs, is at least partially formed within the structure. The lack of the disulfide bonds (Cys11-Cys26 and Cys25-Cys87) could also explain the missing initial part in the structure as they highly contribute to the structural stability of the N-terminus by anchoring the N-terminal tail to the main core of the enzyme. Thus, the here reported structure contains a very loose N-terminus, which does not produce detectable electron density for the first 31 residues due to its high flexibility. In other plant PPO structures the N-terminus embraces one of the four  $\alpha$ -helices of the tetrahelical bundle representing some kind of specific fold. As the N-terminus of *MdPPO1* is highly flexible owing due to the lack of the two disulfide bonds, the above described structural region is partially disordered in the *MdPPO1* structure (Figure S17).

**Mutagenesis studies on *MdPPO1* and the relocation of the cleavage position.** In order to gain additional insights into the cleavage reaction the cleavage site Ser366-Ser367-Ser368-Lys369-Val370 was mutated to Ile367-Asp368-Gly369-Arg370 (mutant-1), which corresponds to the recognition sequence of the serine protease Factor Xa. Thus, mutant-1 was not only designed to test its influence on the self-cleaving process but also to enable cleavage by the use of the external protease Factor Xa. Mutant-1 was successfully cleaved by Factor Xa protease yielding a similar pre-active state as in the case of *MdPPO1* undergoing self-cleaving. ESI-MS analysis of the fragments obtained upon Factor Xa cleavage revealed two new cleavage sites for the mutated enzyme, which in comparison to the wild-type are shifted by 11 amino acids towards the N-terminus and consist of the sequence Lys355-Lys356-Leu357 (Figure S10). Moreover, in a second mutant (mutation-2) the two proteolytic sites (Ser366-Ser367-Ser368-Lys369-Val370) and (Lys355-Lys356-Leu357) were mutated (Table S1). However, a third proteolytic region was appeared (His361-Ala362-Ala363) in between the two previous (Figure S11). Mass spectrometry results (Figures S3, S10 and S11) show that the cleavage site of *MdPPO1* is not characterized by one single peptide bond but rather by a cleavage sequence consisting of four contiguous peptide bonds (Ser366-Ser367-Ser368-Lys369-Val370) for the wild type, two contiguous peptide bonds (Lys355-Lys356-Leu357) for the mutation-1 and two contiguous peptide bonds (His361-Ala362-Ala363) for the mutation-2 exhibiting very high specificity as evidenced by mass spectrometry and the sequence of the C<sub>cleaved</sub>-domain crystal structure. Moreover, several mutants were designed in *MdPPO1* in order to stop the self-cleaving

reaction however without success the mutant which stops the self-cleaving reaction was the deletion of the loop Lys355-Val371 and described in [Table S1](#).

**Pro-MdPPO1 activation requires two steps.** Despite undergoing self-cleaving, activity tests on the cleaved pro-MdPPO1 revealed that the enzyme retained its latency. This observation implies that the proteolytic cleavage within the sequence Ser366-Ser367-Ser368-Lys369-Val370 alone is not sufficient to activate the pro-enzyme. Visual inspection and analysis of the interface between the C-terminal and main-domain by PISA analysis<sup>[15]</sup> revealed strong interactions between the two domains. 33 H-bonds and 13 salt-bridges were detected by PISA analysis and therefore it is suggested that even after the proteolytic reaction, the domains remain attached to each other due to strong electrostatic interface interactions, thereby preserving the enzyme's latency. Thus, self-cleaving of the pro-enzyme converts the enzyme into a stable, pre-active stage, this requires further actions to become fully enzymatically active. Self-cleaved enzyme was *in vitro* activated by applying various salt concentrations (1 M NaCl, 0.5 M KCl, 0.15 M MgCl<sub>2</sub> or 0.15 M CaCl<sub>2</sub>), which putatively disrupt the strong electrostatic inter-domain interactions leading to the spatial separation of the two domains. The same effect was also achieved using the activator SDS (3 mM). However, this *in vitro* activation process might not reflect the *in vivo* maturation process but it is suggested that the enzyme is transformed to the here observed pre-active stage at the same point during the *in vivo* maturation. The C-terminal domain of MdPPO1 could be membrane associated as it has been reported for other PPOs.<sup>[16–18]</sup> Thus, the spatial separation of the domains might *in vivo* be triggered by the fact that C-terminal domain remains attached to a membrane facilitating the departure of the main domain.

**Experiments to elucidate the mode of the self-cleaving reaction.** A series of experiments were conducted to reveal the mechanism of the self-cleaving reaction. The initial consideration was that the C-terminal domain harbors the cleaving moiety. This was supported by the fact that incubation of the pro-MdPPO1 together with different amounts of separated C-terminal domain (C<sub>sole</sub>-domain) accelerated the self-cleaving reaction. Structural inspection of the C-terminal domain did, however, not reveal an obvious cleaving element. Thus, the structure of the C-terminal domain (C<sub>cleaved</sub>, C<sub>sole</sub> and the C-terminal domain of the pro-form) was submitted to the Dali Server, a network for (3D) structural protein comparison, to find similar structures or structural elements in other enzymes that might have proteolytic activity. However, the best hits (besides other PPOs) were the nephrin-binding-domains of several nephrin-receptors<sup>[19]</sup>. No proteolytic enzyme was within the top hits.

In addition, several proteases inhibitors were incubated with pro-MdPPO1 to inhibit the self-cleaving process. The serine protease inhibitors 2 mM phenylmethylsulfonyl fluoride and 2 mM benzamidine hydrochloride did slightly attenuate the self-cleaving process, a serine protease-like mechanism was assumed. Analysis of the sequence in the proximity of the cleavage site revealed the presence of a number of serine residues that could act as the decisive nucleophile. However, when the environment of each serine was examined, no acid and base were found that could form a catalytic triad to carry out the reaction. Only the positioning of S435 resembled to some extent that found in the catalytic moiety of thrombin. Furthermore, there are reports on serine proteases that are able to perform the cleavage reaction in a “serine-only” configuration, that is, only the serine residue is required for the self-cleaving reaction of some proteins.<sup>[20,21]</sup> Therefore, Ser385 and Ser435 were mutated to Gly in different mutants to inhibit the putative serine protease-like mechanism. However, self-cleaving in the resulting mutant was only delayed but not inhibited completely discarding a

serine protease-like reaction as mode of action for the here observed self-cleaving (Table S1).

Since EDTA did also attenuate the self-cleaving process, a metalloprotease-like reaction was also shortly assumed. This assumption was further strengthening by the fact that the separated C-terminal domain possesses a (strong) metal binding site and might thus be the decisive element. Incubation of different metals, 1 mM of ( $Mg^{2+}$ ,  $Mn^{2+}$ ,  $Co^{2+}$ ,  $Ni^{2+}$ ,  $Zn^{2+}$ ,  $Cu^{2+}$  and  $Ca^{2+}$ ) with pro-*MdPPO1* did not show metal-dependent differences or any effect at all. In addition, the calcium binding residues Asp429, Asp431 and Asp479 were mutated to Gly or deleted completely in order to block the metal binding site. However, the resulting mutations did not inhibit the self-cleaving reaction but led to the opposite effect as self-cleaving was accelerated (Table S1). Thus, a metalloprotease-like or in general metal-based reaction was also excluded.

**Structural comparison between the C-terminal domains (C-terminal domain attached in pro-*MdPPO1*,  $C_{cleaved}$  and  $C_{sole}$ -domain).** Structural comparison between the C-terminal domain of the pro-enzyme, the  $C_{cleaved}$ - and  $C_{sole}$ -domains, revealed that the two free C-terminal domains ( $C_{cleaved}$  and  $C_{sole}$ ) exhibit the exact same structure ( $C\alpha$ -RMSD = 0.051 Å, 872 matched atoms), whereas the structure of the C-terminal domain of the pro-enzyme does slightly deviate from the free C-terminal domains ( $C\alpha$ -RMSD of 0.494 Å, 562 matched atoms). All C-terminal domains exhibit the typical  $\beta$ -sandwich 'jelly roll'-like fold consisting of in total seven  $\beta$ -strands (Figure S18), however, the position of one large loop (Asn428-Glu441) differs significantly. In the structures of the separate  $C_{cleaved}$ - or  $C_{sole}$ -domain, this loop moved towards another loop (Glu473-Asp480) in order to form a calcium binding site that stabilizes the C-terminal domain (Figure S19). The bound metal was identified as  $Ca^{+2}$  based on the composition of the used expression media and buffers, the interacting amino acids, the binding geometry and the presence of the anomalous signal (Figure S20). The  $Ca^{+2}$  ion is coordinated by eight O-donor ligands, three aspartate residues (Asp429, Asp431 and Asp479), whereby two of these aspartates (Asp429 and Asp479) act as bidentate ligands and three oxygens arising most likely from water molecules (Figure S21). The calcium binding site is missing in the structure of pro-*MdPPO1* as the two loops forming this site are kept apart by the linker region, which connects the active and C-terminal domain.

### 3. Supplementary Figures

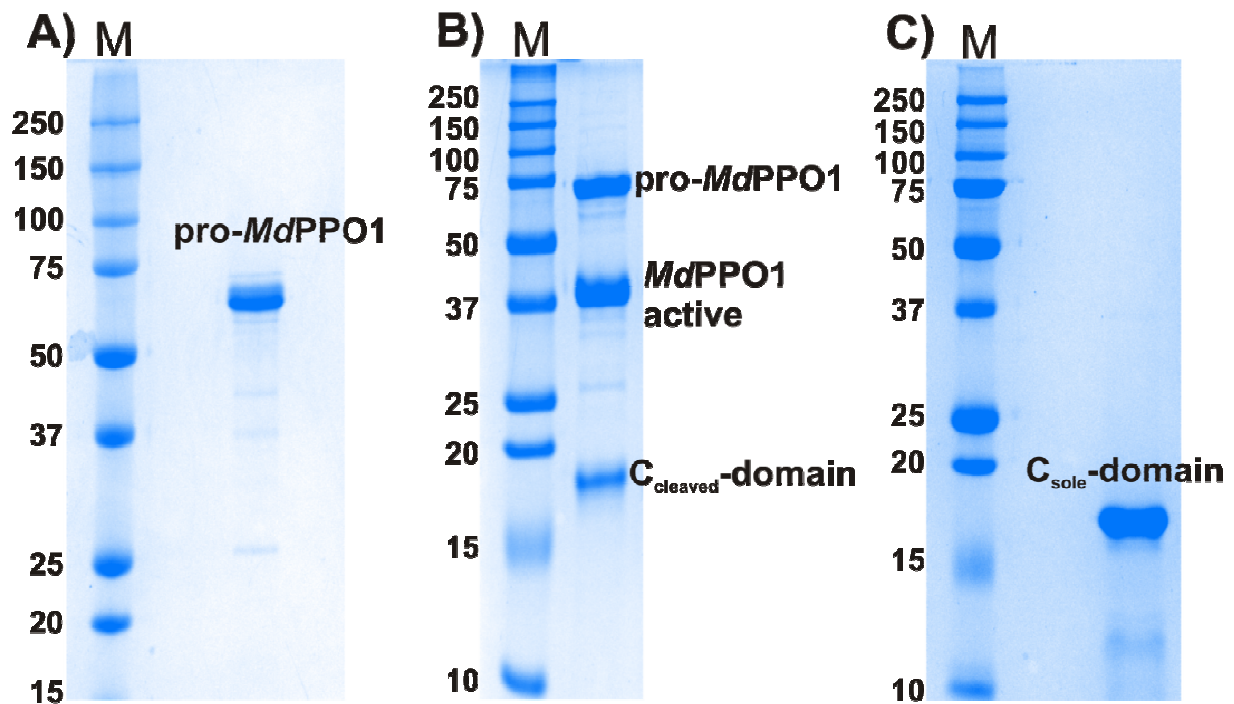

**Figure S1.** SDS PAGE (under reducing conditions) showing the purity of the investigated proteins. (A) pro-MdPPO1, (B) pro-MdPPO1 upon partial self-cleaving resulting in the appearance of the active enzyme and the C-terminal domain (C<sub>cleaved</sub>-domain), (C) recombinantly produced separated C-terminal domain (C<sub>sole</sub>-domain). M indicates the marker (molecular masses are given in kDa).

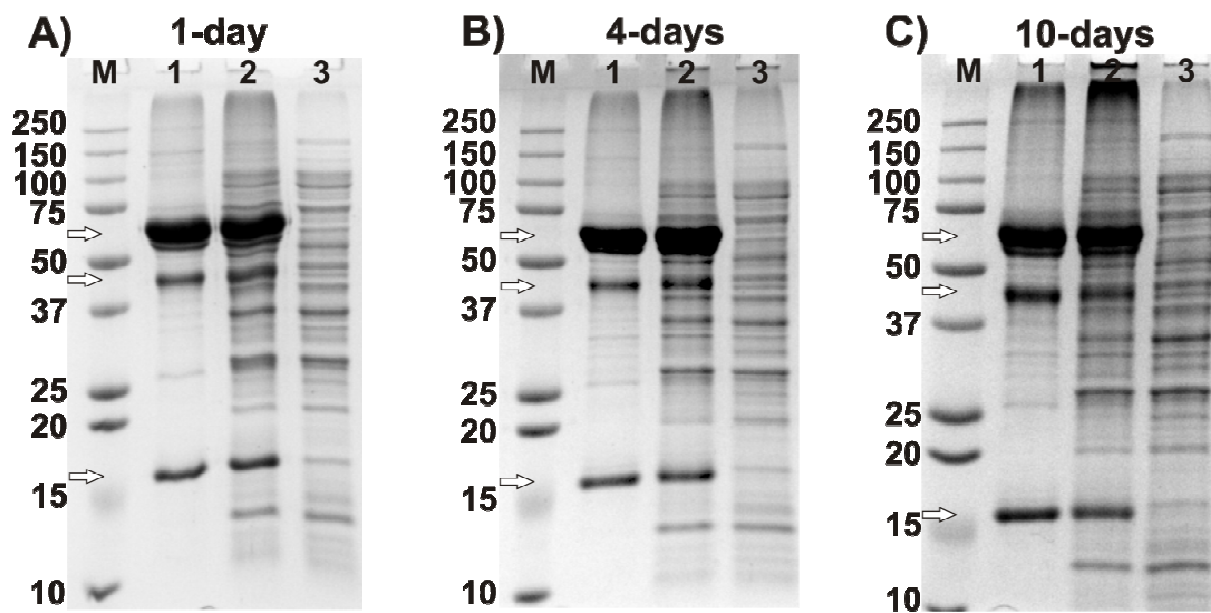

**Figure S2.** SDS PAGE (under reducing conditions) showing the self-cleaving process of *MdPPO1* during time in comparison to the self-cleaving process in a mixture with lysate of *E. coli*. The gels in A-C) show samples reacting for the time interval indicated above the respective gel. Lane 1) 10 µg of *MdPPO1*, lane 2) 10 µg of *MdPPO1* mixing with 50 µg of *E. coli* lysate, lane 3) 50 µg of *E. coli* lysate. The arrows indicate the positions of the pro-enzyme (top), the active enzyme (middle) and the C-terminal domain (bottom).



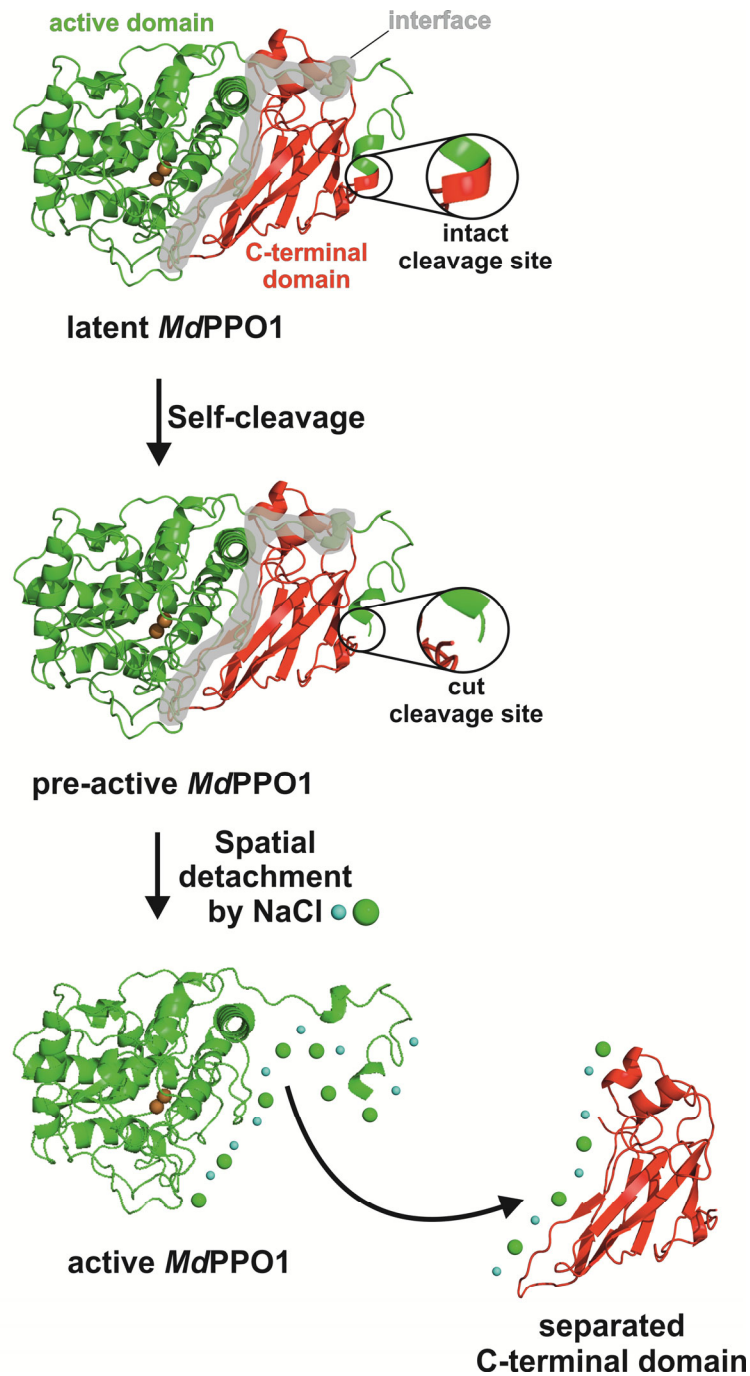

**Figure S3.** *MdPPO1* activation requires two steps. *MdPPO1* reveals a self-cleaving reaction within the sequence Ser366-Ser367-Ser368-Lys369-Val370, although, it is not sufficient to activate the pro-enzyme. The two domains C- and N-terminal reveal strong interactions between them and remain intact. 33 H-bonds and 13 salt-bridges were detected by PISA analysis, therefore, cleaved *MdPPO1* requires further actions to become fully enzymatically active. Self-cleaved *MdPPO1* was *in vitro* activated by applying various salt concentrations (1 M NaCl, 0.5 M KCl, 0.15 M MgCl<sub>2</sub> or 0.15 M CaCl<sub>2</sub>), which putatively disrupt the strong electrostatic inter-domain interactions leading to the spatial separation of the two domains, as represented here with the use of NaCl.

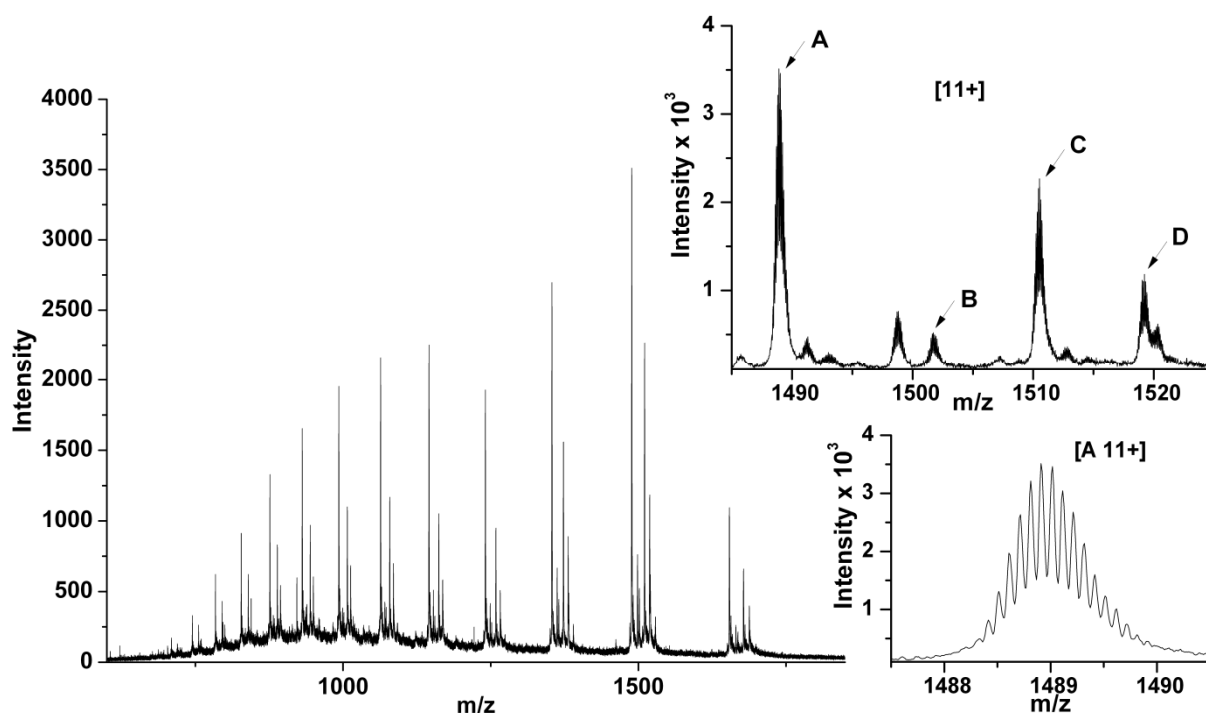

**Figure S4.** Positive mode ESI-QTOF mass spectra of the C<sub>cleaved</sub>-domain obtained by self-cleaving from pro-*MdPPO1*. During and after self-cleavage the sample solution represents a mixture of pro-, active *MdPPO1* as well as of the C<sub>cleaved</sub>-domain (Figure S1). However, the C<sub>cleaved</sub>-domain was ionized best and led to the here presented high-resolution spectra. The inset shows that four different C-terminal species (A-D) were found and the second inset of the charge state [11+] shows that isotopic resolution was achieved. The four different species indicate self-cleaving at four different sites within the sequence (Ser366-Ser367-Ser368-Lys369-Val370). Species A corresponds to the fragment obtained upon cleavage between Lys369-Val370, species B to cleavage between Ser368-Lys369, species C to cleavage between Ser367-Ser368 and species D to cleavage between Ser366-Ser367.

| Species | M calculated Da | M (measured) Da | $\Delta$ /Da |
|---------|-----------------|-----------------|--------------|
| A       | 14879.42        | 14879.87        | -0.45        |
| B       | 15008.65        | 15008.05        | +0.61        |
| C       | 15095.02        | 15095.12        | -0.11        |
| D       | 15181.57        | 15182.20        | -0.63        |



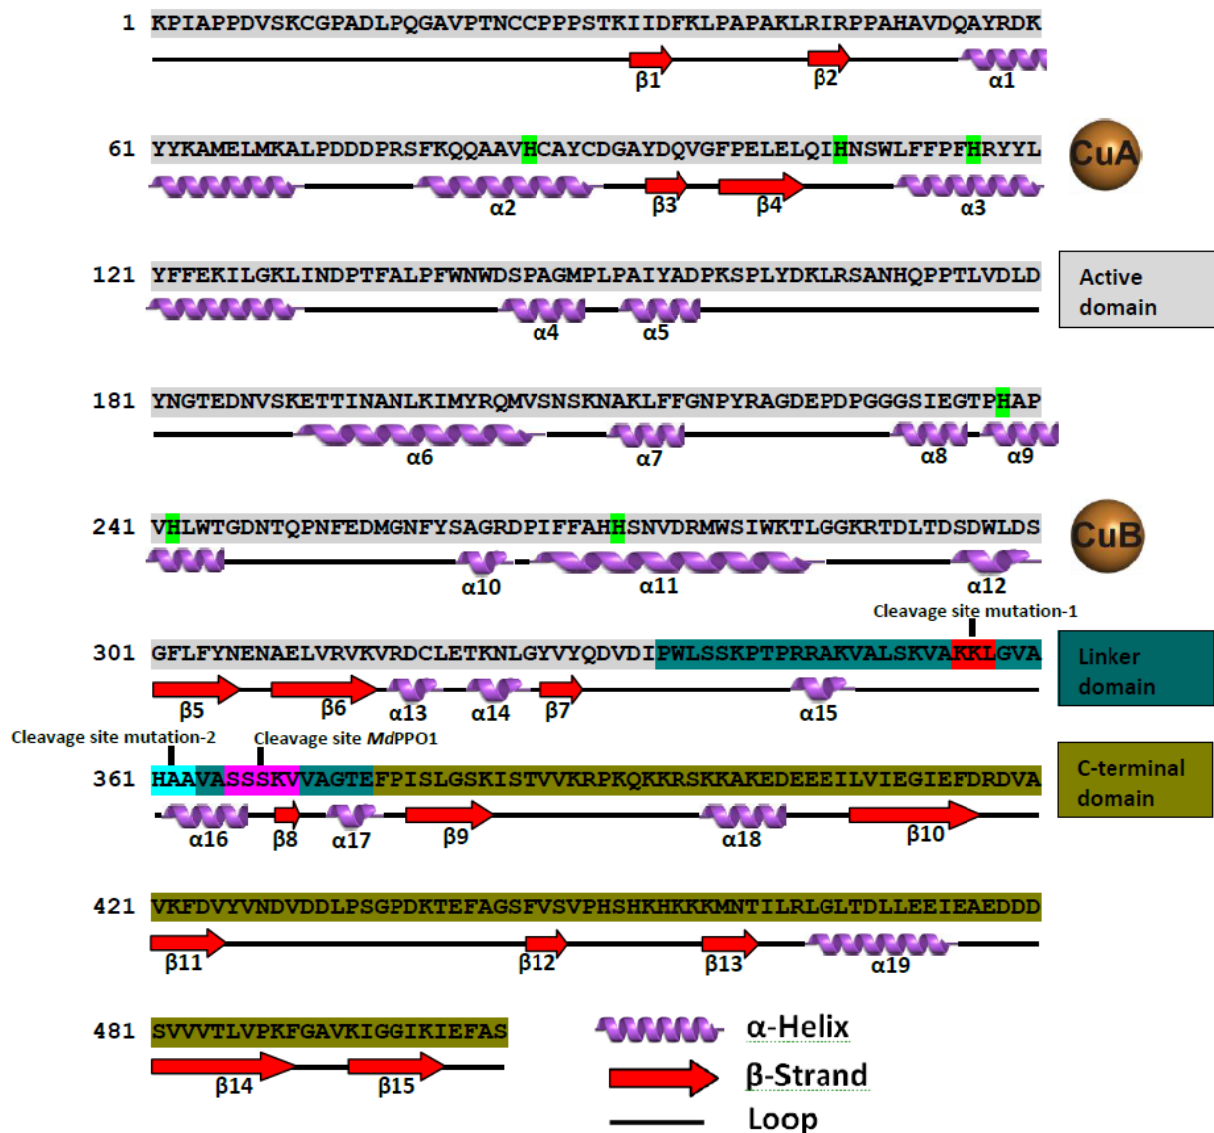

**Figure S5.** Primary and secondary structure of pro-*MdPPO1*. The following regions are highlighted: active domain (grey amino acids), linker domain (blue-green) and the C-terminal domain (olive), dicopper center (CuA and CuB) and the conserved copper-coordinating histidines (green). Moreover, the cleavage sites of the wild type *MdPPO1* (Ser366-Ser367-Ser368-Lys369-Val370, pink), the mutation-1 (Lys355-Lys356-Leu357, red) and the mutation-2 (His361-Ala362-Ala363, cyan) are marked.

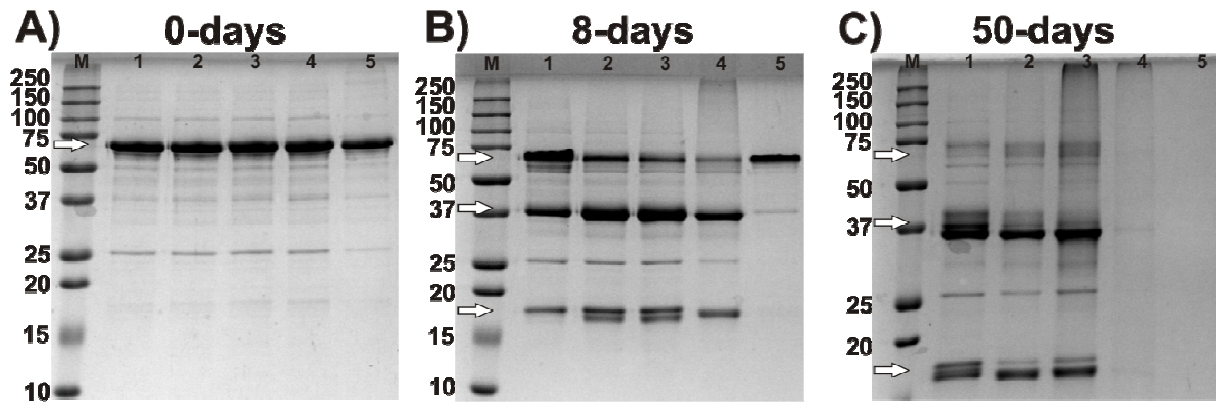

**Figure S6.** SDS-PAGE of *MdPPO1* at different temperatures and time intervals. In every lane 5  $\mu$ g of pro-*MdPPO1* were applied. The gels in A-C) show samples reacting for the time interval indicated above the respective gel. Lane 1) 300  $\mu$ g of *MdPPO1* at 4  $^{\circ}$ C, lane 2) 300  $\mu$ g of *MdPPO1* at 20  $^{\circ}$ C, lane 3) 300  $\mu$ g of *MdPPO1* at 25  $^{\circ}$ C, lane 4) 300  $\mu$ g of *MdPPO1* at 37  $^{\circ}$ C and lane 5) 300  $\mu$ g of *MdPPO1* at 65  $^{\circ}$ C. M indicates the molecular marker (molecular masses in kDa). Self-cleavage of *MdPPO1* was fastest at 37  $^{\circ}$ C. After 8 days the pro-*MdPPO1* has been cleaved completely at 37  $^{\circ}$ C and almost completely at 20  $^{\circ}$ C and 25  $^{\circ}$ C. At 4  $^{\circ}$ C the proteolysis proceeds slower, whereas at 65  $^{\circ}$ C the self-cleavage is negligible. After 50 days the protein was completely cleaved at 4  $^{\circ}$ C, 20  $^{\circ}$ C and 25  $^{\circ}$ C but precipitated at 37  $^{\circ}$ C and 65  $^{\circ}$ C. The arrows indicate the positions of the pro-enzyme (top), the active enzyme (middle) and the C-terminal domain (bottom).

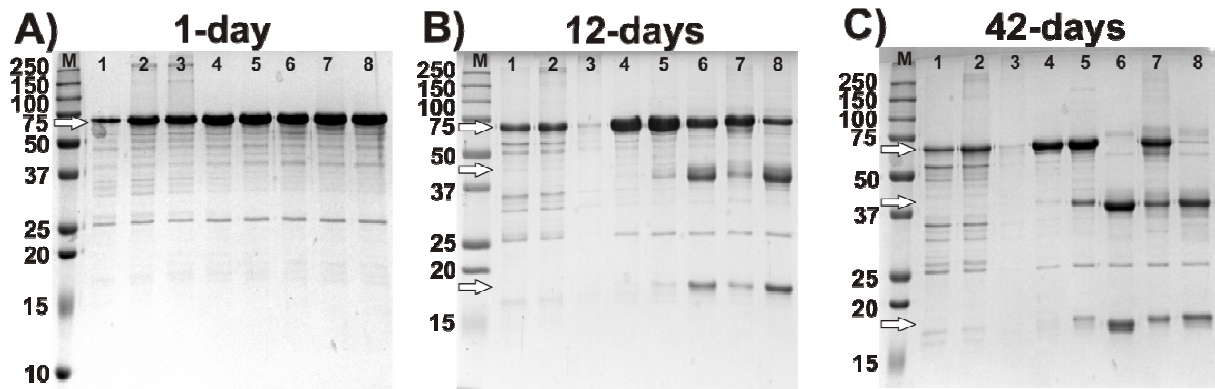

**Figure S7.** SDS-PAGE of *MdPPO1* at different pH values and time intervals. In every lane 5  $\mu\text{g}$  of the pro-*MdPPO1* were applied. The gels in A)-C) show samples reacting for the time interval indicated above the respective gel. Lane 1) 300  $\mu\text{g}$  of *MdPPO1* at pH 2, lane 2) 300  $\mu\text{g}$  of *MdPPO1* at pH 3, lane 3) 300  $\mu\text{g}$  of *MdPPO1* at pH 4, lane 4) 300  $\mu\text{g}$  of *MdPPO1* at pH 5, lane 5) 300  $\mu\text{g}$  of *MdPPO1* at pH 6, lane 6) 300  $\mu\text{g}$  of *MdPPO1* at pH 7, lane 7) 300  $\mu\text{g}$  of *MdPPO1* at pH 8 and lane 8) 300  $\mu\text{g}$  of *MdPPO1* at pH 9. M indicates the molecular marker (molecular masses in kDa). *MdPPO1* shows a clear pH-dependent behavior. At pH 2 and 3, *MdPPO1* is hardly stable and therefore the self-cleavage process could not be tracked appropriately. After 6 days *MdPPO1* precipitates at pH 4. At pH 5 it seems that the self-cleavage does not take place at all as the band of the enzyme does not change even after 42 days. At pH 6 the self-cleavage is very slow as the active enzyme and the C-terminal domain start to be obvious only after 42 days. The pH values of 7 and 9 seem to represent the optimal pH for the self-cleavage process as the active enzyme appears between 6 to 13 days. The enzyme is completely cleaved after 42 to 57 days at these pH values. At pH 8 the reaction shows an interesting delay and seems to be similar to the reaction rate at pH 6. The arrows indicate the positions of the pro-enzyme (top), the active enzyme (middle) and the C-terminal domain (bottom).

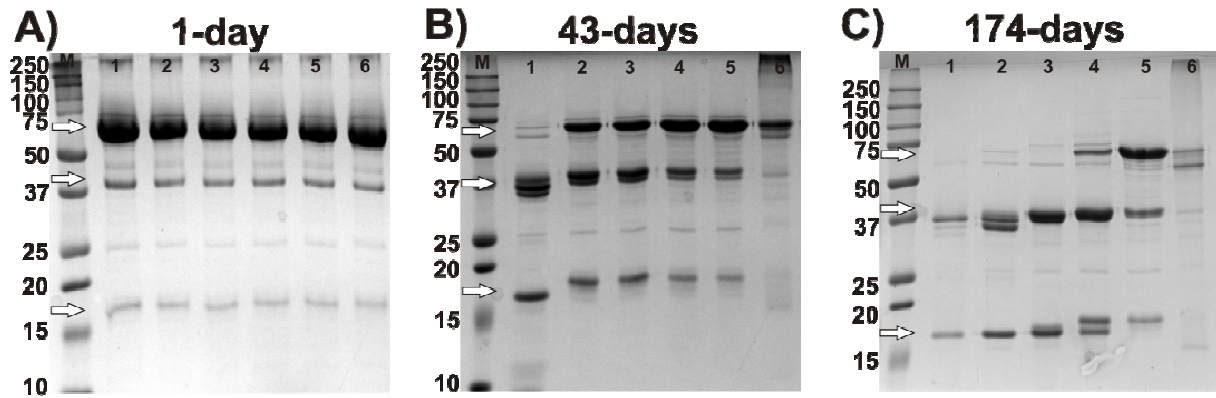

**Figure S8.** SDS-PAGE of *MdPPO1* incubated with serine protease inhibitors phenylmethylsulfonyl fluoride (PMSF) and benzamidine the metalloprotease inhibitor (EDTA) and a commercial protease inhibitor mixture (SigmaFAST) for different time intervals. In every lane 5  $\mu$ g of the pro-*MdPPO1* were applied. The gels in A)-C) show samples reacting for the interval of time. Lane 1) 300  $\mu$ g of *MdPPO1*, lane 2) 300  $\mu$ g of *MdPPO1* with 2 mM PMSF, lane 3) 300  $\mu$ g of *MdPPO1* with 2 mM benzamidine, lane 4) 300  $\mu$ g of *MdPPO1* with 10 mM EDTA, lane 5) 300  $\mu$ g of *MdPPO1* with 2 mM PMSF, 2 mM benzamidine and 10 mM EDTA and lane 6) 300  $\mu$ g of *MdPPO1* with 10  $\mu$ l SigmaFAST protease inhibitor mix (1 tablet in 5 ml). The self-cleavage reaction of *MdPPO1* was remarkably inhibited by both serine protease inhibitors (PMSF and benzamidine) but also by the metalloprotease inhibitor (EDTA). The proteolytic reaction in the samples containing PMSF and benzamidine finished only after 80 days in comparison to the natural reaction which took only 14 to 17 days. *MdPPO1* very slowly cleaved in the solution of SigmaFAST protease inhibitor mix while, the cleaved product precipitated. However, the herein investigated protease inhibitors were not able to stop completely the self-cleaving reaction. The arrows indicate the positions of the pro-enzyme (top), the active enzyme (middle) and the C-terminal domain (bottom).

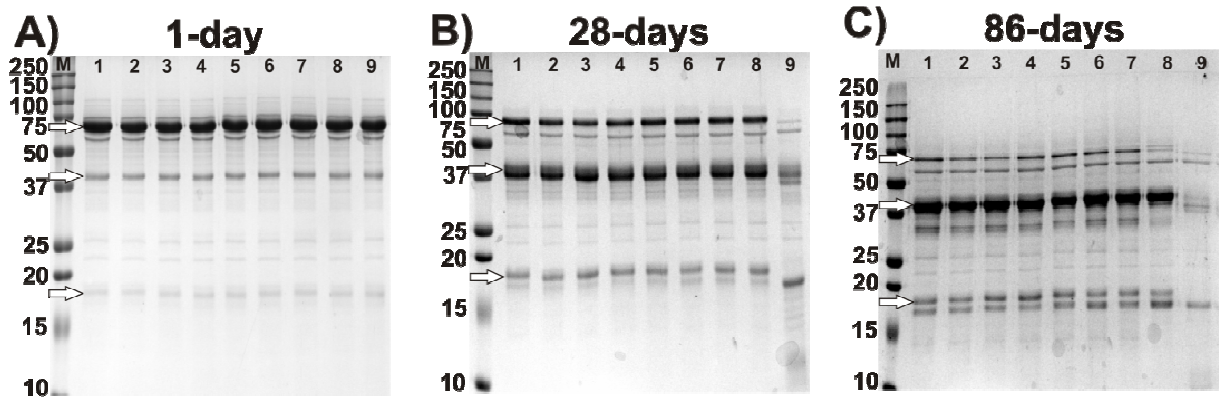

**Figure S9.** SDS-PAGE of *MdPPO1* incubated with the aspartyl protease inhibitor pepstatin A at different time intervals. In every lane 5  $\mu\text{g}$  of pro-*MdPPO1* were applied. The gels in A)-C) show samples reacting for the time interval indicated above the respective gel. Lane 1) 300  $\mu\text{g}$  of *MdPPO1* with 0 mM pepstatin A, lane 2) 300  $\mu\text{g}$  of *MdPPO1* with 0.1  $\mu\text{M}$  pepstatin A, lane 3) 300  $\mu\text{g}$  of *MdPPO1* with 0.25  $\mu\text{M}$  pepstatin A, lane 4) 300  $\mu\text{g}$  of *MdPPO1* with 0.5  $\mu\text{M}$  pepstatin A, lane 5) 300  $\mu\text{g}$  of *MdPPO1* with 1  $\mu\text{M}$  pepstatin A, lane 6) 300  $\mu\text{g}$  of *MdPPO1* with 5  $\mu\text{M}$  pepstatin A, lane 7) 300  $\mu\text{g}$  of *MdPPO1* with 10  $\mu\text{M}$  pepstatin A, lane 8) 300  $\mu\text{g}$  of *MdPPO1* with 20  $\mu\text{M}$  pepstatin A and lane 9) 300  $\mu\text{g}$  of *MdPPO1* with 50  $\mu\text{M}$  pepstatin A. The aspartyl protease inhibitor pepstatin A seems to have no influence on the self-cleavage. All samples reacted similarly without the self-cleavage being inhibited by pepstatin A. The arrows indicate the positions of the pro-enzyme (top), the active enzyme (middle) and the C-terminal domain (bottom).

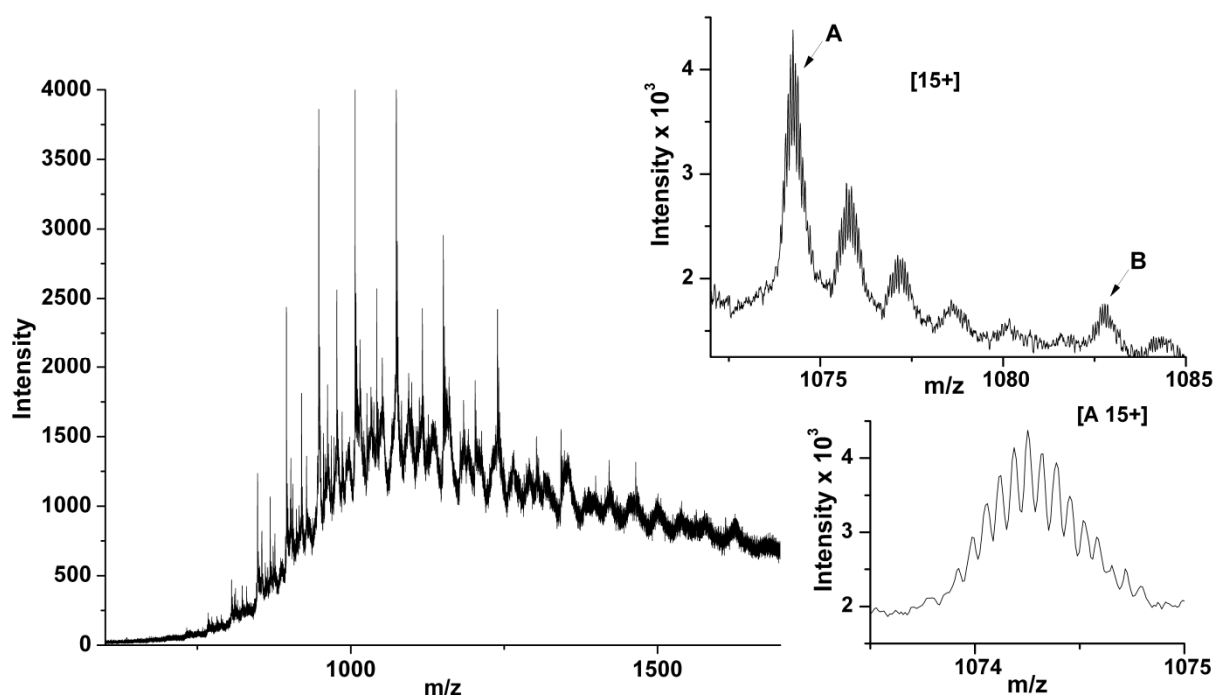

**Figure S10.** Positive mode ESI-QTOF mass spectra of the self-cleaved C<sub>cleaved</sub>-domain from mutation-1. During and after self-cleaving the sample solution represents a mixture of pro- and active *MdPPO1* as well as the free C-terminal domain. However, the C-terminal domain was ionized best and led to the here presented high-resolution spectra. The inset shows that two different species (A-B) were found and the second inset of the charge state [15+] shows that isotopic resolution was achieved. The two different species indicate self-cleaving at two different sites within the sequence (Lys355-Lys356-Leu357). Species A corresponds to the fragment obtained upon cleavage between Lys356-Leu357, species B to cleavage between Lys355-Lys356.

| Species | M calculated Da | M (measured) Da | $\Delta$ /Da |
|---------|-----------------|-----------------|--------------|
| A       | 16099.22        | 16099.23        | +0.01        |
| B       | 16227.40        | 16227.64        | +0.25        |

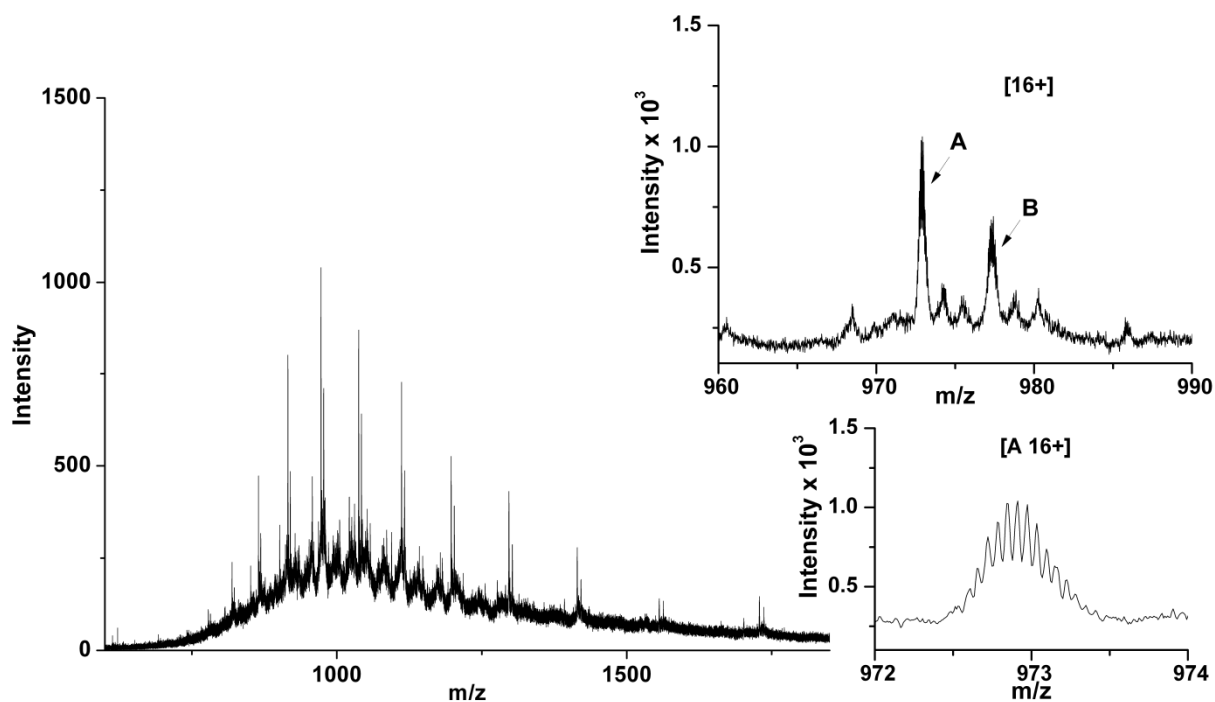

**Figure S11.** Positive mode ESI-QTOF mass spectra of the self-cleaved C<sub>cleaved</sub>-domain from mutation-2. During and after self-cleaving the sample solution represents a mixture of pro- and active *MdPPO1* as well as the free C-terminal domain. However, the C-terminal domain was ionized best and led to the here presented high-resolution spectra. The inset shows that two different species (A-B) were found and the second inset of the charge state [16+] shows that isotopic resolution was achieved. The two different species indicate self-cleavage at two different proteolytic sites within the sequence (His361-Ala362-Ala363). Species A corresponds to the fragment obtained upon cleavage between Ala362-Ala363, species B to cleavage between His361-Ala362.

| Species | M calculated Da | M (measured) Da | $\Delta$ /Da |
|---------|-----------------|-----------------|--------------|
| A       | 15550.27        | 15550.59        | -0.32        |
| B       | 15621.83        | 15621.67        | +0.16        |



|                                                                            |     |                                                                                           |
|----------------------------------------------------------------------------|-----|-------------------------------------------------------------------------------------------|
| <i>MdPPO1</i>                                                              | -2  | -----GPKPIAPPDVSK-CGP-----ADLPQGAVPTNCCPPPS-TKIIDFKLPAPAKLRIRPPAH--AVDQAYRDKYKAMELMK      |
| <i>MdPPO1</i> (-)                                                          | -2  | -----GPKPIAPPDVSK-CGP-----ADLPQGAVPTNCCPPPS-TKIIDFKLPAPAKLRIRPPAH--AVDQAYRDKYKAMELMK      |
| <i>MdPPO2</i>                                                              | -9  | GPLGSPEFFAPVSAFDLTT-CGP-----ADKPDGS-TIDCCPPT-TTIIDFKLPDRGRLRTRIAAQDVAKNPAYLAKYKKAIELMR    |
| <i>MdPPO2</i> (+)                                                          | -9  | GPLGSPEFFAPVSAFDLTT-CGP-----ADKPDGS-TIDCCPPT-TTIIDFKLPDRGRLRTRIAAQDVAKNPAYLAKYKKAIELMR    |
| <i>CgAUS1</i>                                                              | -5  | ----GPLGSAPITAPDITSICKDASSGIGNQEGAIATRKCPCPSLGGKKIKDFQFPNDKVRMRWPAHKGTK--KQVDDYRRAIAAMR   |
| <i>CgAUS1</i> (+)                                                          | -5  | ----GPLGSAPITAPDITSICKDASSGIGNQEGAIATRKCPCPSLGGKKIKDFQFPNDKVRMRWPAHKGTK--KQVDDYRRAIAAMR   |
|                                                                            |     |                                                                                           |
| <i>MdPPO1</i>                                                              | 70  | ALPDDDDPRSFQQAAVHCAYCDGAYDQV--GFPELELQIINNSWLFPPFHRYYLYFFEKILGKGLINDPTFALPFWNWDSPAGMPLPAI |
| <i>MdPPO1</i> (-)                                                          | 70  | ALPDDDDPRSFQQAAVHCAYCDGAYDQV--GFPELELQIINNSWLFPPFHRYYLYFFEKILGKGLINDPTFALPFWNWDSPAGMPLPAI |
| <i>MdPPO2</i>                                                              | 70  | ALPDDDDPRSFQQAQAVHCAYCDGAYDQV--GYSdleIQVHCYCWLFPPFHRWYLYFYEKIMGELIGDPTFALPFWNWDAPAGMYIPEI |
| <i>MdPPO2</i> (+)                                                          | 70  | ALPDDDDPRSFQQAQAVHCAYCDGAYDQV--GYSdleIQVHCYCWLFPPFHRWYLYFYEKIMGELIGDPTFALPFWNWDAPAGMYIPEI |
| <i>CgAUS1</i>                                                              | 71  | ALPDDDDPRSFVSAQAKHCAYCNGGYTQVDSGFDPIDIQIINNSWLFPPFHRWYLYFYERILGSLIDEFPALPYKWKDEPKGMPI SNI |
| <i>CgAUS1</i> (+)                                                          | 71  | ALPDDDDPRSFVSAQAKHCAYCNGGYTQVDSGFDPIDIQIINNSWLFPPFHRWYLYFYERILGSLIDEFPALPYKWKDEPKGMPI SNI |
|                                                                            |     |                                                                                           |
| <i>MdPPO1</i>                                                              | 155 | YA-DPKSPLYDKLRSANHQPPTLVLDLYNGTEDNVSKETTINANLKIIMYRQMVSNKNAKLFPGNYPYRAGDEPD----PGGGSIEGT  |
| <i>MdPPO1</i> (-)                                                          | 155 | YA-DPKSPLYDKLRSANHQPPTLVLDLYNGTEDNVSKETTINANLKIIMYRQMVSNKNAKLFPGNYPYRAGDEPD----PGGGSIEGT  |
| <i>MdPPO2</i>                                                              | 156 | FT-DTSSSLYDQYRNAAHQPPKLLDFNYSGTDDNVDDATRIKENLTTMYQQMVSKATSHRLFGEFYSAGDDPS----PGAGNIESI    |
| <i>MdPPO2</i> (+)                                                          | 156 | FT-DTSSSLYDQYRNAAHQPPKLLDFNYSGTDDNVDDATRIKENLTTMYQQMVSKATSHRLFGEFYSAGDDPS----PGAGNIESI    |
| <i>CgAUS1</i>                                                              | 164 | FLGDASNFLYDQYRDANHIEDRIVLDLYDGDKDKIPDQQQVACNLSTVYRDLVRNGVDPTSFPGGKYVAGDSPVANGDPSVGSVEAG   |
| <i>CgAUS1</i> (+)                                                          | 164 | FLGDASNFLYDQYRDANHIEDRIVLDLYDGDKDKIPDQQQVACNLSTVYRDLVRNGVDPTSFPGGKYVAGDSPVANGDPSVGSVEAG   |
|                                                                            |     |                                                                                           |
| <i>MdPPO1</i>                                                              | 237 | PHAPVHLWTGDNTPNFEDMGNFYSAGRDPPIFFAHSNVDRMWSIWKTLGG--KRTDLTSDWLDSDGFLFYENAEELVRVKVRCLETT   |
| <i>MdPPO1</i> (-)                                                          | 237 | PHAPVHLWTGDNTPNFEDMGNFYSAGRDPPIFFAHSNVDRMWSIWKTLGG--KRTDLTSDWLDSDGFLFYENAEELVRVKVRCLETT   |
| <i>MdPPO2</i>                                                              | 238 | PHNNIHFWTGDPTQTNGEDMGAFYSSGRDPLFTYSHSNVDRMWSIYKDKLG--GTDIEKTDWLDTEFLFYDEKKNLVRVKVCDSLDT   |
| <i>MdPPO2</i> (+)                                                          | 238 | PHNNIHFWTGDPTQTNGEDMGAFYSSGRDPLFTYSHSNVDRMWSIYKDKLG--GTDIEKTDWLDTEFLFYDEKKNLVRVKVCDSLDT   |
| <i>CgAUS1</i>                                                              | 251 | SHTAVHRWVGDPPTQNNEDMGNFYSAGYDPVFIYIHANVDRMWKWLKELRRLPGHVDITDPDLNAYSIVFYDENKDLVRVYNKDCVNL  |
| <i>CgAUS1</i> (+)                                                          | 251 | SHTAVHRWVGDPPTQNNEDMGNFYSAGYDPVFIYIHANVDRMWKWLKELRRLPGHVDITDPDLNAYSIVFYDENKDLVRVYNKDCVNL  |
| Deletion stops self-cleaving in <i>MdPPO1</i> (-)                          |     |                                                                                           |
| <i>MdPPO1</i>                                                              | 323 | KNLGYVYQ--D-VDIPWLSKPTPRRAKVALSKVAKVLGVAHAAVASSKVVAGTEFFPISLGSKISTVVKRPKQKRSKKAKEDEEE     |
| <i>MdPPO1</i> (-)                                                          | 323 | KNLGYVYQ--D-VDIPWLSKPTPRRAKVALSKVA-----VAGTEFFPISLGSKISTVVKRPKQKRSKKAKEDEEE               |
| <i>MdPPO2</i>                                                              | 323 | KNLGYVYD--EKVPIPWLKSPTTRKS--TNK-----RKAAVSSDL--TTTFFPATLSDTISVEVTRPSATKRTTAQKKAQDE        |
| <i>MdPPO2</i> (+)                                                          | 323 | KNLGYVYD--EKVPIPWLKSPTTRKS--TNKVAKVLGVARAAVSSDL--TTTFFPATLSDTISVEVTRPSATKRTTAQKKAQDE      |
| <i>CgAUS1</i>                                                              | 338 | DKLKYNIENSKEVFPWRNSRPPQRRKSAQVA-----TTGD--VKTVEQTKFPVRLNQIFKVRVVRPAVN--RTEEEKDQANE        |
| <i>CgAUS1</i> (+)                                                          | 338 | DKLKYNIENSKEVFPWRNSRPPQRRKSAQVAKVAKVLGVAITGD--VKTVEQTKFPVRLNQIFKVRVVRPAVN--RTEEEKDQANE    |
| Peptide initiates self-cleaving in <i>MdPPO2</i> (+) and <i>CgAUS1</i> (+) |     |                                                                                           |
| <i>MdPPO1</i>                                                              | 407 | ILVIEGIEFDRDVAVKFDVYVNDVD--DLPSGDKTEFAGSFVSVPHSHKHKKKMNTILRLGLTDLLEEIEAEDDDSVVVTLVKPKFG   |
| <i>MdPPO1</i> (-)                                                          | 391 | ILVIEGIEFDRDVAVKFDVYVNDVD--DLPSGDKTEFAGSFVSVPHSHKHKKKMNTILRLGLTDLLEEIEAEDDDSVVVTLVKPKFG   |
| <i>MdPPO2</i>                                                              | 395 | VLVIKGLIEFAGNETVVKFDVYVNDVA--DSLAKDKSEFAGSFVHVPHKH--KNIKTNLRLSITSLLEELDAETDSSLVVTLVKPKVG  |
| <i>MdPPO2</i> (+)                                                          | 404 | VLVIKGLIEFAGNETVVKFDVYVNDVA--DSLAKDKSEFAGSFVHVPHKH--KNIKTNLRLSITSLLEELDAETDSSLVVTLVKPKVG  |
| <i>CgAUS1</i>                                                              | 412 | VLLIKKIKYDSGKFKVDFVNDKLDGVTTPCDPEYAGGFAQIPHNDKRSVMVMTSTARFGLNELLEDNTTEGEYATVTLVPRTG       |
| <i>CgAUS1</i> (+)                                                          | 421 | VLLIKKIKYDSGKFKVDFVNDKLDGVTTPCDPEYAGGFAQIPHNDKRSVMVMTSTARFGLNELLEDNTTEGEYATVTLVPRTG       |
|                                                                            |     |                                                                                           |
| <i>MdPPO1</i>                                                              | 492 | A--VKIGGIKIEFAS*--                                                                        |
| <i>MdPPO1</i> (-)                                                          | 476 | A--VKIGGIKIEFAS*--                                                                        |
| <i>MdPPO2</i>                                                              | 478 | KGPIITIGGFSIELINTTGRLERPHRD*                                                              |
| <i>MdPPO2</i> (+)                                                          | 486 | KGPIITIGGFSIELINTTGRLERPHRD*                                                              |
| <i>CgAUS1</i>                                                              | 499 | CEDLTVGEIKIELVPIPKA*                                                                      |
| <i>CgAUS1</i> (+)                                                          | 508 | CEDLTVGEIKIELVPIPKA*                                                                      |

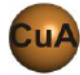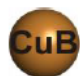

**Figure S12.** Sequence alignment of *MdPPO1*, *MdPPO2*, *CgAUS1* and the mutants *MdPPO1*(-), *MdPPO2*(+) and *CgAUS1*(+). Highlighted are the conserved copper-coordinating histidines (green) of the dicopper centre. The deletion of the *MdPPO1* (KVLGVAHAAVASSKV) leads to the *MdPPO1*(-) which stops the self-cleavage and remains intact and from the other hand the insertion (KVAKVLGVA) to the *MdPPO2* and *CgAUS1* lead to the *MdPPO2*(+) and *CgAUS1*(+) mutants respectively which both exhibit self-cleavage reaction. The grey part of the sequence represents the active domain, the blue-green part represents the linker domain, while the olive part represents the C-terminal domain. The yellow parts at the start and the end of the sequences are remaining residues from the vector.



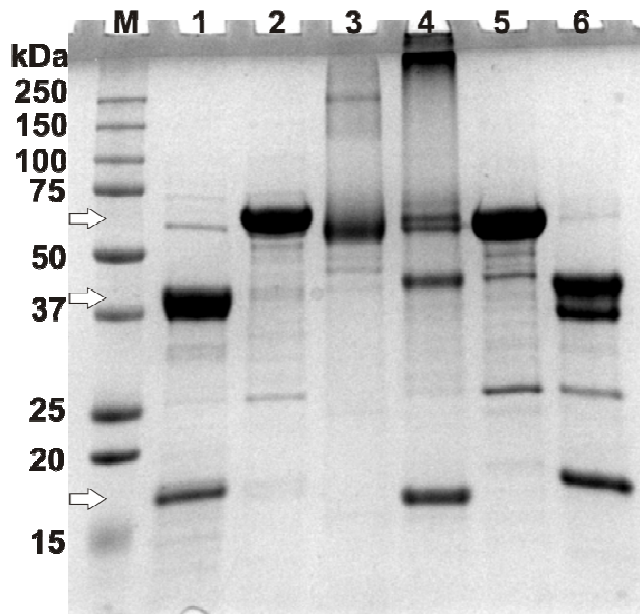

**Figure S13.** SDS-PAGE of *MdPPO1*, *MdPPO2* and *CgAUS1* and the respective mutants *MdPPO1*(-), *MdPPO2*(+) and *CgAUS1*(+). Lane 1) 10  $\mu$ g of *MdPPO1* upon self-cleavage resulting in the appearance of the active and the C-terminal domain ( $C_{\text{cleaved}}$ -domain), lane 2) 10  $\mu$ g of *MdPPO1*(-) mutant which remains intact, lane 3) 10  $\mu$ g of *MdPPO2* does not exhibit any cleavage event, lane 4) 10  $\mu$ g of *MdPPO2*(+) mutants which initiates the self-cleaving, lane 5) 10  $\mu$ g of *CgAUS1* does not exhibit any cleavage and lane 6) 10  $\mu$ g of *CgAUS1*(+) mutant which initiates the self-cleaving event. All the samples were applied to SDS-PAGE under reduced conditions. M indicates the marker (molecular masses are given in kDa).

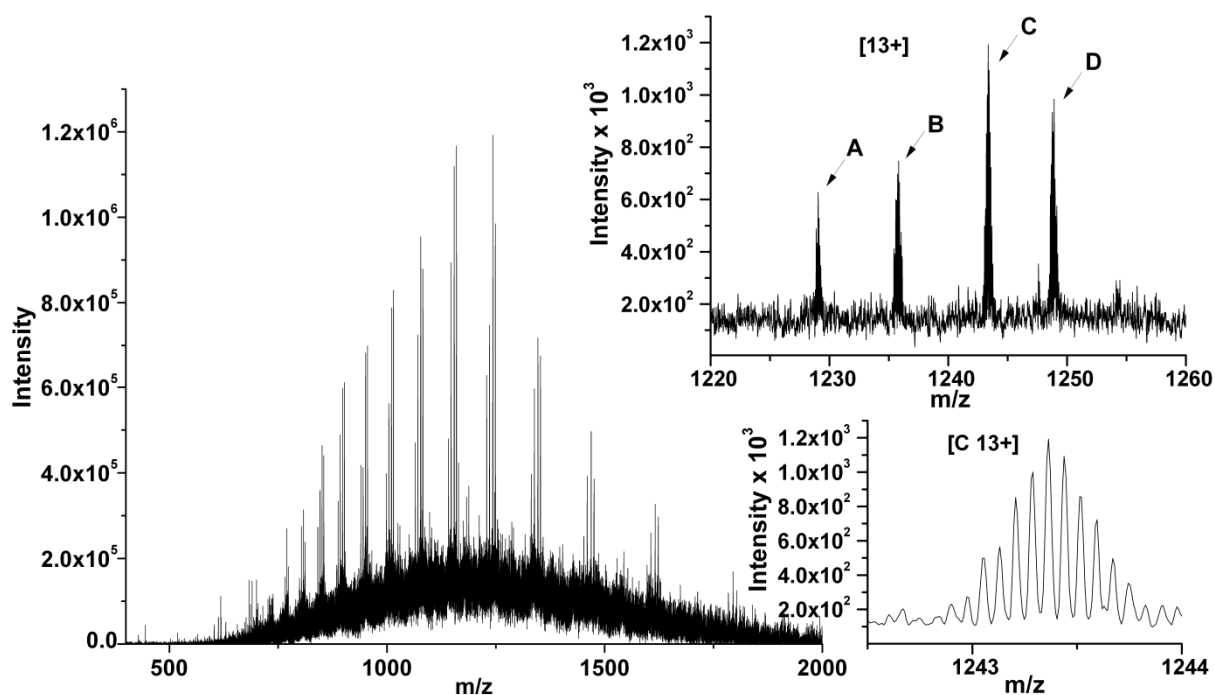

**Figure S14.** Positive mode ESI-LTQ-Orbitrap Velos of the self-cleaved C<sub>cleaved</sub>-domain from *MdPPO2(+)* mutation. During and after self-cleavage the sample solution represents a mixture of pro- and active *MdPPO2* as well as the free C-terminal domain. The C-terminal domain was ionized best and led to the here presented high-resolution spectra. The inset shows that two different species (A-B-C-D) were found and the second inset of the charge state [13+] shows that isotopic resolution was achieved. The four different species indicate self-cleavage at two different sites within the sequence (Ala362-Ala363-Val364-Ser365-S366). Species A corresponds to the fragment obtained upon cleavage between -Ser366, species B to cleavage between Val364-Ser365, species C to the cleavage between Ala363-Val364 and species D to the cleavage between Ala362-Ala363.

| Species | M calculated Da | M (measured) Da | $\Delta$ /Da |
|---------|-----------------|-----------------|--------------|
| A       | 15964.81        | 15964.54        | -0.27        |
| B       | 16051.89        | 16051.54        | -0.35        |
| C       | 16151.02        | 16151.61        | +0.59        |
| D       | 16222.10        | 16221.65        | -0.45        |

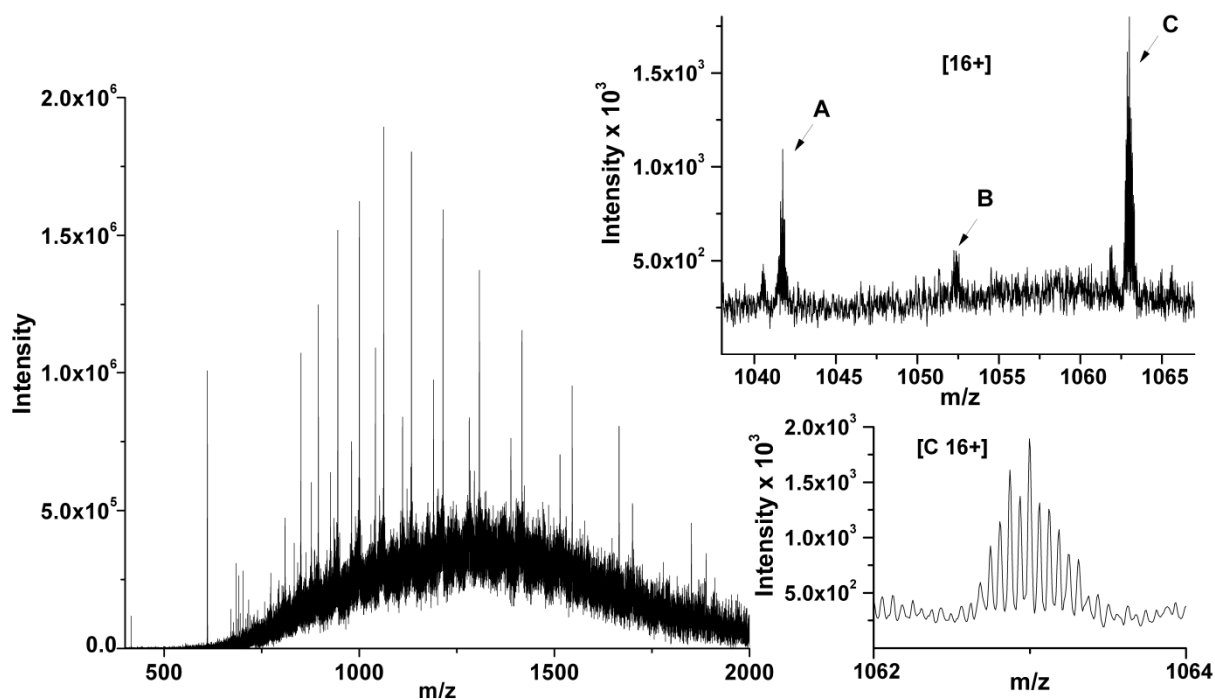

**Figure S15.** Positive mode ESI-LTQ-Orbitrap Velos of the self-cleaved  $C_{\text{cleaved}}$ -domain from  $CgAUS1(+)$  mutant. During and after self-cleaving the sample solution represents a mixture of pro- and active  $CgAUS1(+)$  as well as the C-terminal domain. The C-terminal domain was ionized best and led to the here presented high-resolution spectra. The inset shows that two different species (A-B-C) were found and the second inset of the charge state [16+] shows that isotopic resolution was achieved. The three different species indicate self-cleavage at different sites within the sequence (Lys374-Leu375-Gly376-Val377-Ala378-Thr379). Species A corresponds to the fragment obtained upon cleavage between Ala378- species B to cleavage between Gly376-Val377, species C to the cleavage between Lys374-Leu375.

| Species | M calculated Da | M (measured) Da | $\Delta$ /Da |
|---------|-----------------|-----------------|--------------|
| A       | 16651.84        | 16651.67        | -0.17        |
| B       | 16822.04        | 16821.69        | -0.41        |
| C       | 16992.25        | 16991.84        | -0.36        |

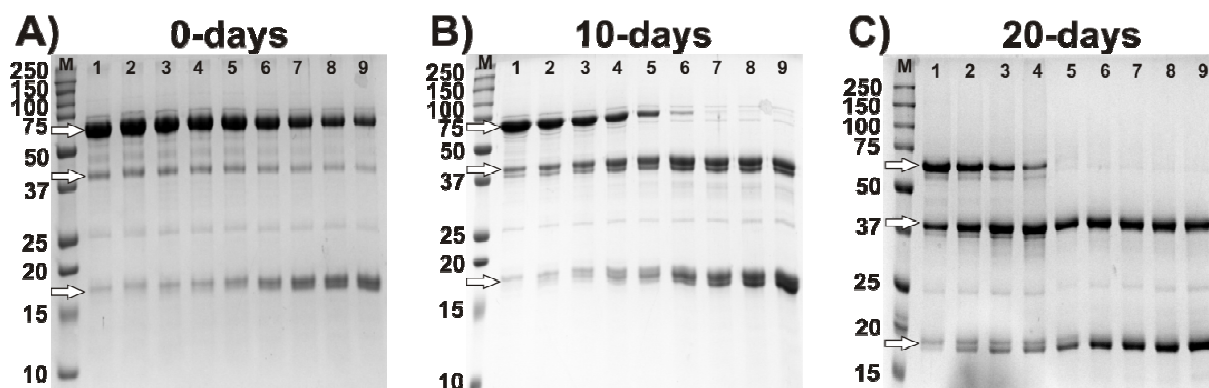

**Figure S16.** SDS-PAGE of *MdPPO1* incubated with external C-terminal domain ( $C_{\text{sole}}$ -domain) for different time intervals. In every lane 7,5  $\mu\text{g}$  of the latent *MdPPO1* were applied. A-C show gels obtained after different incubation times as indicated above the respective gels Lane 1) 300  $\mu\text{g}$  of *MdPPO1* with 0  $\mu\text{g}$   $C_{\text{sole}}$ -domain, lane 2) 300  $\mu\text{g}$  of *MdPPO1* with 10  $\mu\text{g}$   $C_{\text{sole}}$ -domain, lane 3) 300  $\mu\text{g}$  of *MdPPO1* with 20  $\mu\text{g}$   $C_{\text{sole}}$ -domain, lane 4) 300  $\mu\text{g}$  of *MdPPO1* with 40  $\mu\text{g}$   $C_{\text{sole}}$ -domain, lane 5) 300  $\mu\text{g}$  of *MdPPO1* with 80  $\mu\text{g}$   $C_{\text{sole}}$ -domain, lane 6) 300  $\mu\text{g}$  of *MdPPO1* with 200  $\mu\text{g}$   $C_{\text{sole}}$ -domain, lane 7) 300  $\mu\text{g}$  of *MdPPO1* with 400  $\mu\text{g}$   $C_{\text{sole}}$ -domain, lane 8) 300  $\mu\text{g}$  of *MdPPO1* with 600  $\mu\text{g}$   $C_{\text{sole}}$ -domain and lane 9) 300  $\mu\text{g}$  of *MdPPO1* with 900  $\mu\text{g}$   $C_{\text{sole}}$ -domain. M indicates the molecular marker (molecular masses in kDa). Pro-*MdPPO1* and  $C_{\text{sole}}$ -domain were mixed and incubated at 4°C. After only one day the mixtures containing higher amounts of  $C_{\text{sole}}$ -domain (lanes 7, 8 and 9) exhibit remarkably higher proteolytic activity than those with lower amounts of  $C_{\text{sole}}$ -domain. After 4 to 7 days, *MdPPO1* is almost completely cleaved in the samples containing high amounts of  $C_{\text{sole}}$ -domain (lanes 7, 8 and 9). The arrows indicate the positions of the pro-*MdPPO1* (top), the active enzyme (middle) and the C-terminal domain (bottom).

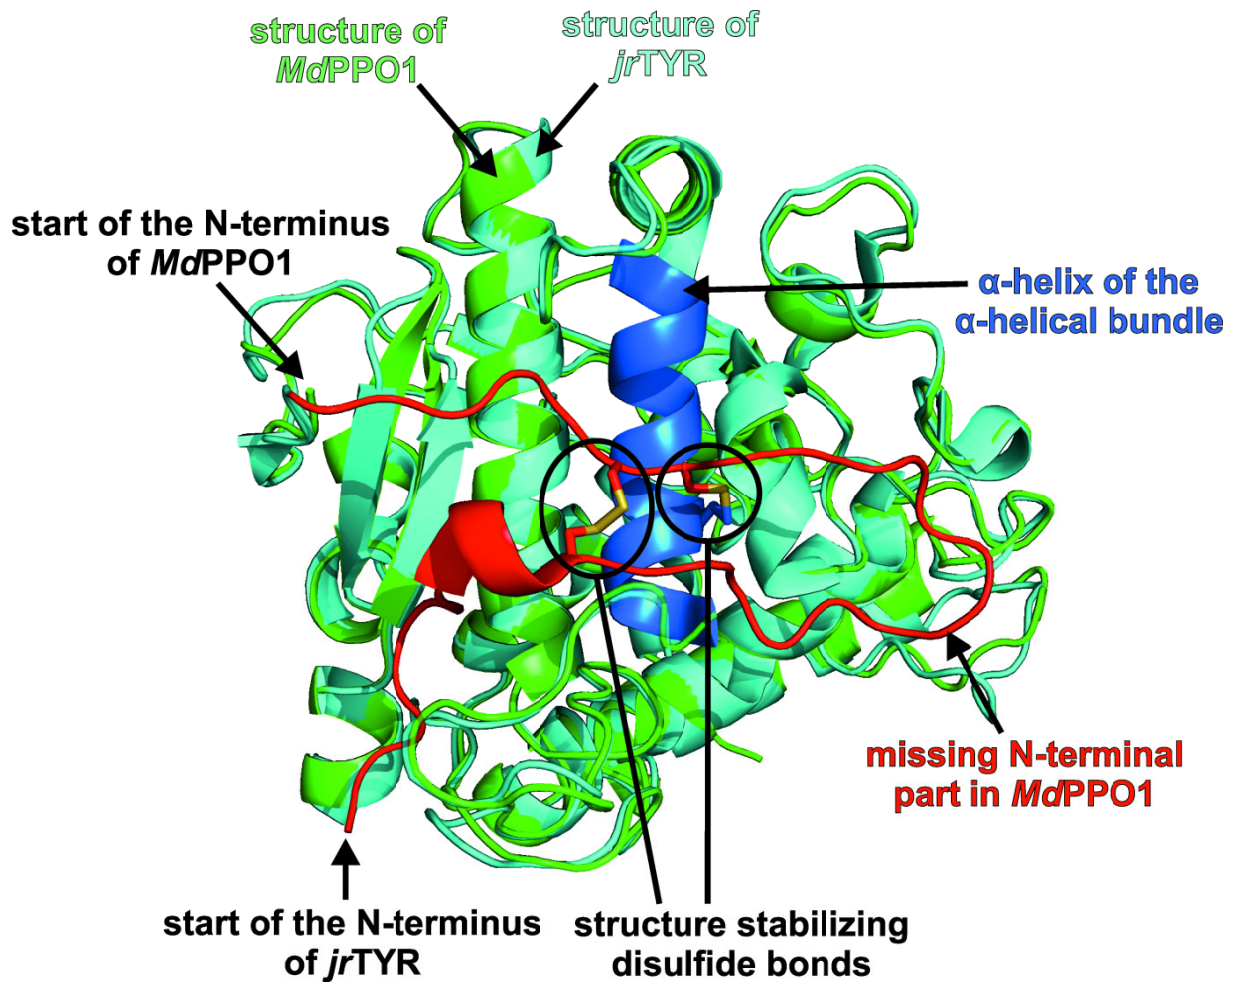

**Figure S17.** Structural alignment of *MdPPO1* (PDB 6ELS)<sup>[5]</sup> and *jrTYR* (PDB 5CE9)<sup>[10,11]</sup>. The main domains of the two tyrosinases have been aligned. The N-terminal part of *jrTYR* (31 amino acids), which is missing in *MdPPO1*, is highlighted in red color. The two conserved disulfide bonds are marked by black color (circles). The N-terminal part in the structure of the pro-*MdPPO1* was not obvious due to the lack of electron density. Our assumption for why the N-terminal part is missing is the lack of the conserved disulfide bonds in *MdPPO1* (Cys11-Cys26 and Cys25-Cys87). In other plant PPOs like *jrTYR*, the N-terminal part embraces one α-helix of the tetrahelical bundle, which is highlighted in blue. The lack of the stabilizing disulfide bonds leads to a flexible N-terminal part and hence to a compromised order of the respective region.

***MdPPO1***  
C-terminal domain

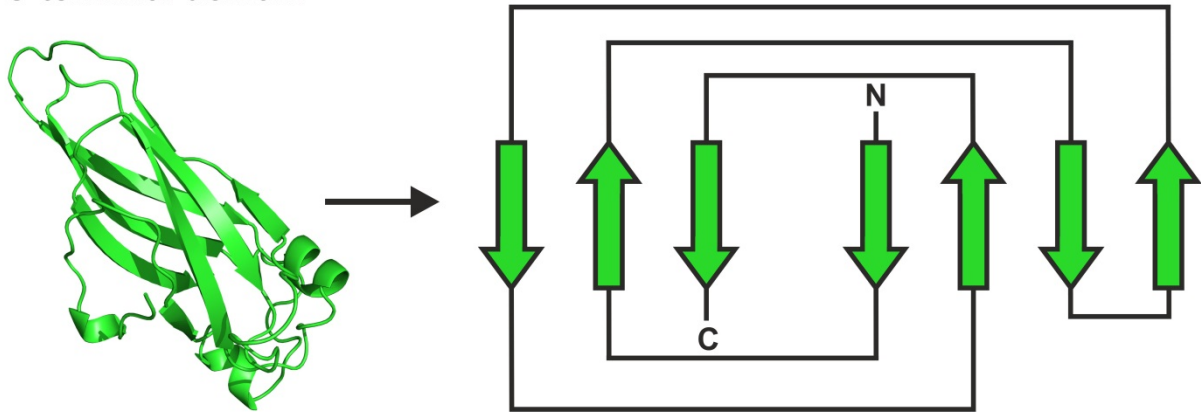

**Figure S18.** Structural topology of the  $C_{\text{cleaved}}$ -domain (PDB 6ELT) and the  $C_{\text{sole}}$ -domain (PDB 6ELV).

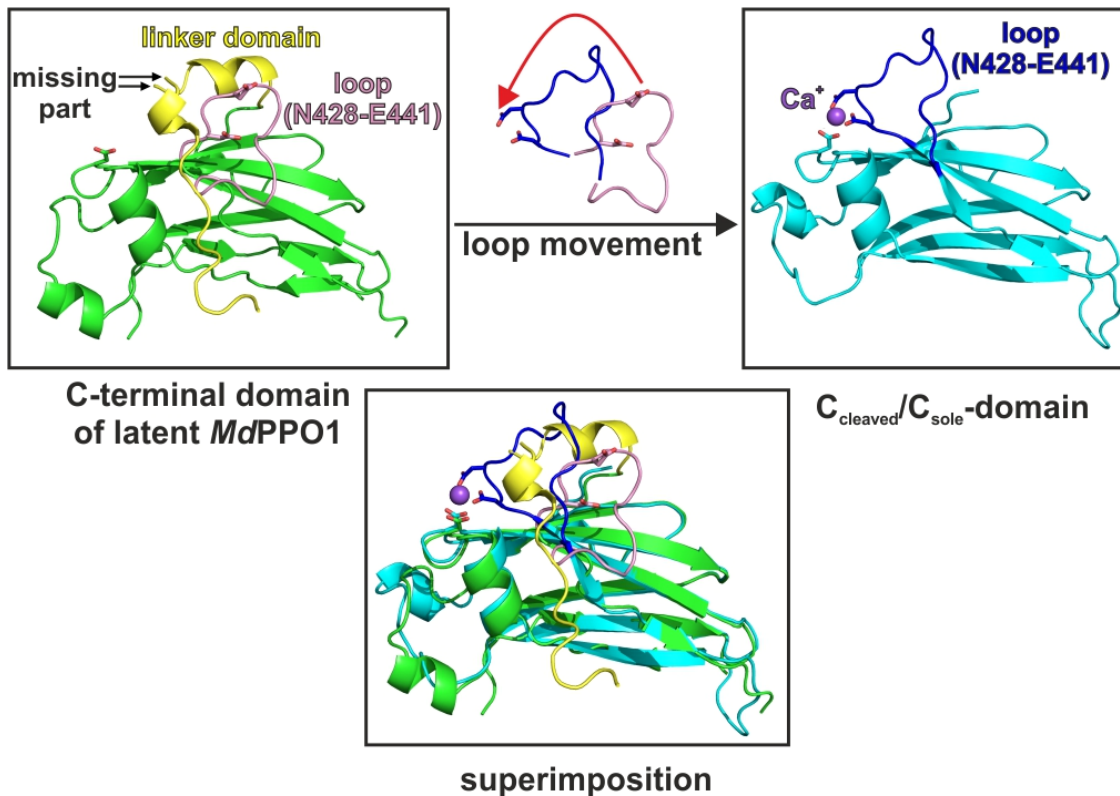

**Figure S19.** Comparison between the C-terminal domain of pro-*MdPPO1* and the separated C-terminal domain  $C_{\text{cleaved}}$  /  $C_{\text{sole}}$ . The figure illustrates the movement of the loop (Asn428-Thr440) by indicating its position in the C-terminal structure of the pro-enzyme (left, domain in green and loop in pink) and in the separated C-terminal structure (right, domain in cyan and loop in dark blue). This loop movement leads to the formation of the  $\text{Ca}^{2+}$  binding site in the  $C_{\text{cleaved}}$ - and  $C_{\text{sole}}$ -domain, respectively. A superimposition of both C-terminal structures is shown in the middle (pink loop = loop position in the C-terminal domain of the pro-enzyme; blue loop = loop position in the separated C-terminal domain).

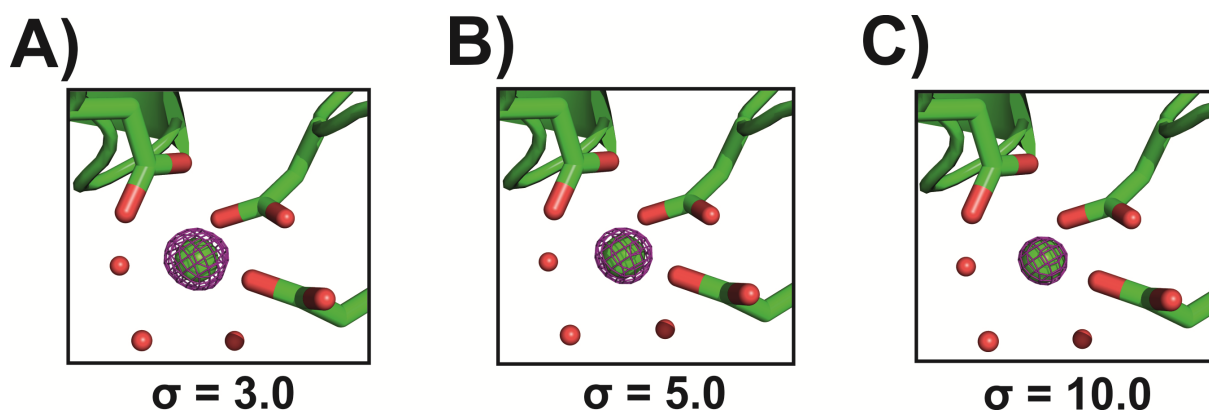

**Figure S20.** Identification of the bound metals in the  $C_{\text{cleaved-}}$  and  $C_{\text{sole-}}$  domain. **A) - C)** show the crystal structure of the  $C_{\text{sole-}}$  domain as green cartoon, whereas the anomalous signal of the bound metal (cyan sphere) is shown by an anomalous difference map (purple mesh), contoured at 3.0, 5.0 and 10.0 sigma, respectively. Based on these results and the composition of the used media and buffers calcium was identified as the metal binding site in both structures.

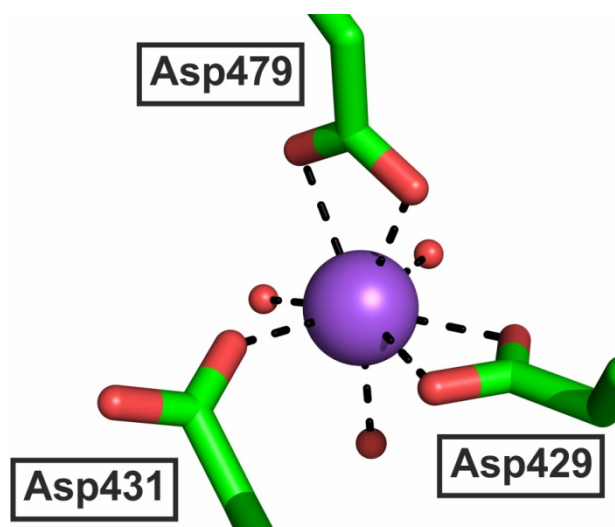

**Figure S21.** Geometry of the  $\text{Ca}^{2+}$  binding in the  $C_{\text{cleaved-}}$  and  $C_{\text{sole-}}$  domain. The  $\text{Ca}^{2+}$  ion coordinates to eight O-donor ligands, three aspartate residues (Asp429, Asp431 and Asp479) and three water molecules, whereby two of these aspartates (Asp429 and Asp479) act as bidentate ligands.

## 4. Supplementary Tables

**Table S1. Mutations in *MdPPO1*, *MdPPO2* and *CgAUS1* and the corresponding cleavage sites.**

|    | <b>Enzyme</b>       | <b>Target</b>                                                       | <b>Mutation</b>                                        | <b>Result</b> | <b>Cleavage site</b>               |
|----|---------------------|---------------------------------------------------------------------|--------------------------------------------------------|---------------|------------------------------------|
| 1  | <i>MdPPO1</i>       | -                                                                   | -                                                      | Self-cleavage | S'S'S'K'V <sub>(365-369)</sub>     |
| 2  | <i>MdPPO1</i> -mut1 | SSKV <sub>(366-369)</sub>                                           | IDGR                                                   | Self-cleavage | K'K'L <sub>(355-357)</sub>         |
| 3  | <i>MdPPO1</i>       | KKL <sub>(355-357)</sub>                                            | GAG                                                    | Self-cleavage | H'A'AVA'S'S <sub>(360-366)</sub>   |
| 4  | <i>MdPPO1</i> -mut2 | KKL / SSKV <sub>(355-357) / (366-369)</sub>                         | GAG / IDGR                                             | Self-cleavage | H'A'A <sub>(359-362)</sub>         |
| 5  | <i>MdPPO1</i>       | KVAKKLGVAH <sub>(352-361)</sub>                                     | deletion                                               | Self-cleavage | S'S <sub>(356-357)</sub>           |
| 6  | <i>MdPPO1</i>       | KVAKKLGVAH / S <sub>435</sub> <sub>(352-361) / 435</sub>            | deletion / G <sub>435</sub>                            | Self-cleavage | S'S <sub>(356-357)</sub>           |
| 7  | <i>MdPPO1</i>       | DVDDLPSGP <sub>(429-437)</sub>                                      | deletion                                               | Self-cleavage | A'S'SSK'V <sub>(365-370)</sub>     |
| 8  | <i>MdPPO1</i>       | DVDDLPSGP <sub>(429-437) / KVAKKLGVAH</sub><br><sub>(352-361)</sub> | deletion                                               | Self-cleavage | S'AAVAS'SSK'V <sub>(351-360)</sub> |
| 9  | <i>MdPPO1</i>       | S <sub>385</sub>                                                    | G <sub>385</sub>                                       | Self-cleavage | A'S'S <sub>(365-367)</sub>         |
| 10 | <i>MdPPO1</i>       | D <sub>429</sub> / D <sub>431</sub>                                 | G <sub>429</sub> / G <sub>431</sub>                    | Self-cleavage | S'K'V <sub>(367-369)</sub>         |
| 11 | <i>MdPPO1</i>       | S <sub>435</sub>                                                    | G <sub>435</sub>                                       | Self-cleavage | S'SS'K'V <sub>(365-369)</sub>      |
| 12 | <i>MdPPO1</i>       | D <sub>429</sub> / D <sub>431</sub> / S <sub>435</sub>              | G <sub>429</sub> / G <sub>431</sub> / G <sub>435</sub> | Self-cleavage | K'L <sub>(356-357)</sub>           |
| 13 | <i>MdPPO1</i>       | D <sub>479</sub>                                                    | G <sub>479</sub>                                       | Self-cleavage | K'L <sub>(356-357)</sub>           |
| 14 | <i>MdPPO1</i> (-)   | KKLGVAAHA AVSSSKVV <sub>(355-371)</sub>                             | deletion                                               | Intact        | -                                  |
| 15 | <i>MdPPO2</i>       | -                                                                   | -                                                      | Intact        | -                                  |
| 16 | <i>MdPPO2</i> (+)   | K <sub>350</sub> -R <sub>351</sub> - Insertion in-between           | KVAKKLGVA                                              | Self-cleavage | A'A'V'S'S <sub>(362-366)</sub>     |
| 17 | <i>CgAUS1</i>       | -                                                                   | -                                                      | Intact        | -                                  |
| 18 | <i>CgAUS1</i> (+)   | A <sub>369</sub> -T <sub>370</sub> - Insertion in-between           | KVAKKLGVA                                              | Self-cleavage | K'LG'VA'T <sub>(374-379)</sub>     |



**Table S2. Primers for the construction of the C<sub>sole</sub>-domain of *MdPPO1* in pGEX-6P-1 and the mutants of *MdPPO1*, *MdPPO2* and *CgAUS1*.**

| Mutation                                                                                                                       | Primers                                                                                                            | Template                     |
|--------------------------------------------------------------------------------------------------------------------------------|--------------------------------------------------------------------------------------------------------------------|------------------------------|
| C <sub>sole</sub> -domain                                                                                                      | fw 5' GCAGCTGTTGCGTCGTC 3'<br>rev 5' GGGCCCTGGAACAGAAC 3'                                                          | <i>MdPPO1</i><br>(pGEX-6P-1) |
| Mutation-1<br>SSKV <sub>(366-369)</sub> - IDGR                                                                                 | fw 5' gggagaGTGGCAGGCACTGAGTTC 3'<br>rev 5' gtcgatCGACGCAACAGCTGCGTG 3'                                            | <i>MdPPO1</i><br>(pGEX-6P-1) |
| Mutation-2<br>KKL <sub>(355-357)</sub> - GAG                                                                                   | fw 5' tggtGGAGTTGCACACGCAGCT 3'<br>rev 5' gcaccCGCTACTTTGCTCAATGCAAC 3'                                            | <i>MdPPO1</i><br>(pGEX-6P-1) |
| Mutation-3<br>KKL / SSKV <sub>(355-357)</sub> / <sub>(366-369)</sub> - GAG / IDGR                                              | fw 5' tggtGGAGTTGCACACGCAGCT 3'<br>rev 5' gcaccCGCTACTTTGCTCAATGCAAC 3'                                            | <i>MdPPO1</i><br>mutation-1  |
| Mutation-4<br>KVAKKLGVAH <sub>(352-361)</sub> / deletion                                                                       | fw 5' GCAGCTGTTGCGTCGTC 3'<br>rev 5' GCTCAATGCAACTTCGCC 3'                                                         | <i>MdPPO1</i><br>(pGEX-6P-1) |
| Mutation-5<br>KVAKKLGVAH <sub>(352-361)</sub> / S <sub>435</sub> - deletion / G <sub>435</sub>                                 | fw 5' TGA CT T G C C G g g t G G G C 3'<br>rev 5' T C G A C G T C A T T C A C A T A C A C A T C A A A C T T C A 3' | <i>MdPPO1</i><br>mutation-4  |
| Mutation-6<br>DVDDLPSGP <sub>(429-437)</sub> - deletion                                                                        | fw 5' GACAAGACGGAGTTTGCC 3'<br>rev 5' ATTCACATACACATCAAAC TT CAC 3'                                                | <i>MdPPO1</i><br>(pGEX-6P-1) |
| Mutation-7<br>DVDDLPSGP <sub>(429-437)</sub> / KVAKKLGVAH <sub>(352-361)</sub> - deletions                                     | fw 5' GACAAGACGGAGTTTGCC 3'<br>rev 5' ATTCACATACACATCAAAC TT CAC 3'                                                | <i>MdPPO1</i><br>mutation-4  |
| Mutation-8<br>S <sub>385</sub> - G <sub>385</sub>                                                                              | fw 5' GTCGAAGATAgggACGGTGGTGA 3'<br>rev 5' CCCAGACTTATCGGGAAC 3'                                                   | <i>MdPPO1</i><br>(pGEX-6P-1) |
| Mutation-9<br>D <sub>429</sub> / D <sub>431</sub> - G <sub>429</sub> / G <sub>431</sub>                                        | fw 5' GTATGTGAATGgCGTCGgTGACT 3'<br>rev 5' ACATCAAAC TT C A C A G C C A C G 3'                                     | <i>MdPPO1</i><br>(pGEX-6P-1) |
| Mutation-10<br>S <sub>435</sub> - G <sub>435</sub>                                                                             | fw 5' TGA CT T G C C G g g t G G G C 3'<br>rev 5' T C G A C G T C A T T C A C A T A C A C A T C A A A C T T C A 3' | <i>MdPPO1</i><br>(pGEX-6P-1) |
| Mutation-11<br>D <sub>429</sub> / D <sub>431</sub> / S <sub>435</sub> - G <sub>429</sub> / G <sub>431</sub> / G <sub>435</sub> | fw 5' TGA CT T G C C G g g t G G G C C T 3'<br>rev 5' c c g A C G c c a T T C A C A T A C A C A T C A A A C 3'     | <i>MdPPO1</i><br>(pGEX-6P-1) |
| Mutation-12<br>D <sub>479</sub> / G <sub>479</sub>                                                                             | fw 5' GGCGGAGGACggtGACA 3'<br>rev 5' TCAATTTCTCCAACAAATCTGTCAAC 3'                                                 | <i>MdPPO1</i><br>(pGEX-6P-1) |
| Mutation-13<br>KVLGVAHA AVASSKVV <sub>(355-371)</sub> - deletion                                                               | fw 5' GTGGCAGGCACTGAGTTC 3'<br>rev 5' CGCTACTTTGCTCAATGC 3'                                                        | <i>MdPPO1</i><br>(pGEX-6P-1) |
| Mutation-14<br>K <sub>350</sub> -R <sub>351</sub> - Insertion KVAKKLGVA                                                        | fw 5' gctgggagttgcaAGAAAGGCCGAGTTTCA 3'<br>rev 5' ttctcgctactttCTTATTCGTCGACTTACGAG 3'                             | <i>MdPPO2</i><br>(pGEX-6P-1) |
| Mutation-15<br>A <sub>369</sub> -T <sub>370</sub> - Insertion KVAKKLGVA                                                        | fw 5' gctgggagttgcaACGACTGGAGATGTGAAGAC 3'<br>rev 5' ttctcgctactttCGCAACCTGGCACTCTT 3'                             | <i>CgAUS1</i><br>(pGEX-6P-1) |

**Table S3. Data collection and processing of pro-MdPPO1, C<sub>cleaved</sub>-domain and C<sub>sole</sub>-domain.**

|                                                            | Pro-MdPPO1<br>(PDB 6ELS)                              | C <sub>cleaved</sub> -domain<br>(PDB 6ELT)            | C <sub>sole</sub> -domain<br>(PDB 6ELV)               |
|------------------------------------------------------------|-------------------------------------------------------|-------------------------------------------------------|-------------------------------------------------------|
| <b>Crystal data and data collection</b>                    |                                                       |                                                       |                                                       |
| Diffraction source                                         | ID-23, ESRF                                           | ID-30A-1, ESRF                                        | ID-23-1, ESRF                                         |
| Wavelength (Å)                                             | 0.9724                                                | 0.9660                                                | 0.9724                                                |
| Temperature (K)                                            | 100                                                   | 100                                                   | 100                                                   |
| Detector                                                   | PILATUS 6M                                            | PILATUS 2M                                            | PILATUS 6M                                            |
| Crystal-detector distance (mm)                             | 190                                                   | 116                                                   | 280                                                   |
| Rotation range per image (°)                               | 0.1                                                   | 0.15                                                  | 0.15                                                  |
| Total rotation range (°)                                   | 320                                                   | 125.1                                                 | 360                                                   |
| Exposure time per image (s)                                | 0.125                                                 | 0.06                                                  | 0.045                                                 |
| Space group                                                | <i>P</i> 2 <sub>1</sub> 2 <sub>1</sub> 2 <sub>1</sub> | <i>P</i> 2 <sub>1</sub> 2 <sub>1</sub> 2 <sub>1</sub> | <i>P</i> 2 <sub>1</sub> 2 <sub>1</sub> 2 <sub>1</sub> |
| <i>a</i> , <i>b</i> , <i>c</i> (Å)                         | 50.70, 80.15, 115.96                                  | 45.23, 50.14, 50.72                                   | 45.13, 50.10, 50.54                                   |
| Mosaicity (°)                                              | 0.173                                                 | 0.15                                                  | 0.08                                                  |
| Resolution range (Å)                                       | 46.45 - 1.346                                         | 35.66 - 1.35                                          | 35.58 - 1.05                                          |
| Total No. of reflections                                   | 1214526 (117878)                                      | 117282 (11826)                                        | 577356 (16715)                                        |
| No. of unique reflections                                  | 104709 (10123)                                        | 25835 (1281)                                          | 51007 (3321)                                          |
| Completeness (%)                                           | 99.51 (97.62)                                         | 99.0 (100.00)                                         | 94 (62.00)                                            |
| Redundancy                                                 | 11.6 (11.6)                                           | 4.5 (4.7)                                             | 11.3 (50)                                             |
| $\langle I/\sigma(I) \rangle$                              | 11.72 (2.02)                                          | 10.41 (1.74)                                          | 20.85 (2.72)                                          |
| $R_{p.i.m.}$                                               | 0.12 (1.174)                                          | 0.093 (0.937)                                         | 0.016 (0.248)                                         |
| $R_{p.i.m.}^\dagger$                                       | 0.034 (0.337)                                         | 0.042 (0.422)                                         | 0.058 (0.572)                                         |
| CC <sub>1/2</sub> <sup>#</sup>                             | 0.996 (0.708)                                         | 0.998 (0.659)                                         | 0.999 (0.837)                                         |
| Overall <i>B</i> factor from Wilson plot (Å <sup>2</sup> ) | 14.00                                                 | 12.07                                                 | 10.30                                                 |
| <b>Refinement statistics</b>                               |                                                       |                                                       |                                                       |
| Resolution range (Å)                                       | 46.45 - 1.35                                          | 35.66 - 1.35                                          | 35.58 - 1.05                                          |
| No. of unique reflections refined against                  | 104707 (10123)                                        | 25834                                                 | 51002                                                 |
| $R_{work}^*$ (%)                                           | 14.29 (28.52)                                         | 17.09                                                 | 14.76                                                 |
| $R_{free}^{**}$ (%)                                        | 17.93                                                 | 20.10                                                 | 16.07                                                 |
| Average B-factor (Å <sup>2</sup> )                         | 19.00                                                 | 17.00                                                 | 16.00                                                 |

$\dagger R_{p.i.m.} = \sum_{hkl} \{ 1 / [ (N(hkl) - 1) ] \}^{1/2} \sum_i |I_i(hkl) - \langle I(hkl) \rangle| / \sum_{hkl} \sum_i I_i(hkl)$ , where  $I_i(hkl)$  is the *i*th observation of reflection *hkl* and  $\langle I(hkl) \rangle$  is the weighted average intensity for all observations of reflection *hkl*.

<sup>#</sup> CC<sub>1/2</sub> is defined as the correlation coefficient between two random half data sets.

\*  $R_{work} = \sum |F_{calcd} - F_{obs}| / \sum |F_{obs}|$ , where  $F_{calcd}$  and  $F_{obs}$  are the calculated and observed structure factor amplitudes, respectively

\*\*  $R_{free}$  is calculated for a randomly chosen 5 % of the reflections within each dataset.

## 5. References

- [1] I. Kampatsikas, A. Bijelic, M. Pretzler, A. Rompel, *Sci. Rep.* **2017**, *7*, 8860.
- [2] U. K. Laemmli, *Nature* **1970**, *227*, 680–685.
- [3] D. F. Swinehart, *J. Chem. Educ.* **1962**, *39*, 333.
- [4] E. Gasteiger, C. Hoogland, A. Gattiker, S. Duvaud, M. Wilkins, R. Appel, A. Bairoch, in *Proteomics Protoc. Handb.* (Ed.: J. Walker), Humana Press, **2005**, pp. 571–607.
- [5] I. Kampatsikas, A. Bijelic, M. Pretzler, A. Rompel, *Acta Crystallogr. Sect. F Struct. Biol. Commun.* **2017**, *73*, 491–499.
- [6] W. Kabsch, *Acta Crystallogr. D Biol. Crystallogr.* **2010**, *66*, 125–132.
- [7] S. F. Altschul, W. Gish, W. Miller, E. W. Myers, D. J. Lipman, *J. Mol. Biol.* **1990**, *215*, 403–410.
- [8] C. Molitor, S. G. Mauracher, A. Rompel, *Acta Crystallogr. Sect. F Struct. Biol. Commun.* **2015**, *71*, 746–751.
- [9] C. Molitor, S. G. Mauracher, A. Rompel, *Proc. Natl. Acad. Sci. U. S. A.* **2016**, *113*, E1806–E1815.
- [10] F. Zekiri, A. Bijelic, C. Molitor, A. Rompel, *Acta Crystallogr. Sect. F Struct. Biol. Commun.* **2014**, *70*, 832–834.
- [11] A. Bijelic, M. Pretzler, C. Molitor, F. Zekiri, A. Rompel, *Angew. Chem. Int. Ed.* **2015**, *54*, 14677–14680.
- [12] P. D. Adams, P. V. Afonine, G. Bunkóczi, V. B. Chen, I. W. Davis, N. Echols, J. J. Headd, L.-W. Hung, G. J. Kapral, R. W. Grosse-Kunstleve, et al., *Acta Crystallogr. D Biol. Crystallogr.* **2010**, *66*, 213–221.
- [13] A. Šali, T. L. Blundell, *J. Mol. Biol.* **1993**, *234*, 779–815.
- [14] T. C. Terwilliger, R. W. Grosse-Kunstleve, P. V. Afonine, N. W. Moriarty, P. H. Zwart, L.-W. Hung, R. J. Read, P. D. Adams, *Acta Crystallogr. D Biol. Crystallogr.* **2008**, *64*, 61–69.
- [15] E. Krissinel, K. Henrick, *J. Mol. Biol.* **2007**, *372*, 774–797.
- [16] M. Pretzler, A. Bijelic, A. Rompel, in *Ref. Module Chem. Mol. Sci. Chem. Eng.*, Elsevier, **2015**. doi: 10.1016/B978-0-12-409547-2.11521-5
- [17] M. Pretzler, A. Bijelic, A. Rompel, *Sci. Rep.* **2017**, *7*, 1810.
- [18] S. G. Mauracher, C. Molitor, C. Michael, M. Kragl, A. Rizzi, A. Rompel, *Phytochemistry* **2014**, *99*, 14–25.
- [19] E. Seiradake, A. Schaupp, D. del T. Ruiz, R. Kaufmann, N. Mitakidis, K. Harlos, A. R. Aricescu, R. Klein, E. Y. Jones, *Nat. Struct. Mol. Biol.* **2013**, *20*, 958–964.
- [20] Ö. D. Ekici, M. Paetzel, R. E. Dalbey, *Protein Sci. Publ. Protein Soc.* **2008**, *17*, 2023–2037.
- [21] M. Paetzel, *Biochim. Biophys. Acta BBA - Mol. Cell Res.* **2014**, *1843*, 1497–1508.
